# Supplementary material for: Reduced Expression of Brain-Enriched microRNAs in Glioblastomas Permits Targeted Regulation of a Cell Death Gene
Source: PLoS One. 2011 Sep 2;6(9):e24248. doi: 10.1371/journal.pone.0024248 (PMC3166303; doi:10.1371/journal.pone.0024248)
Supplement: Table S3 — Cortical dysplasia brain miRNA transcriptome. (XLSX) [file pone.0024248.s012.xlsx]

## Sheet: TableS3
Table S3: Cortical Dysplasia Brain miRNA transcriptome
miRNA name	Read count Non-tumor Brain ALL
hsa-miR-9	1066409
hsa-miR-26a	741076
hsa-miR-181a	545190
hsa-let-7a	538685
hsa-miR-125b	441291
hsa-let-7b	323168
hsa-let-7c	178033
hsa-miR-29c	161701
hsa-miR-143	102331
hsa-miR-128	95399
hsa-miR-29a	87017
hsa-let-7f	84299
hsa-miR-124	78662
hsa-miR-132	60024
hsa-miR-27b	57596
hsa-miR-22	52606
hsa-let-7e	46663
hsa-miR-221	45628
hsa-miR-383	41136
hsa-miR-181b	38056
hsa-miR-127-3p	26699
hsa-miR-23b	17693
hsa-miR-219-2-3p	16594
hsa-miR-30a*	16174
hsa-miR-125a-5p	14113
hsa-miR-99b	13954
hsa-miR-92b	13742
hsa-miR-21	12588
hsa-miR-30e*	12211
hsa-miR-7	11550
hsa-miR-27a	10914
hsa-miR-433	10113
hsa-miR-191	9547
hsa-miR-92a	9543
hsa-miR-320a	9206
hsa-miR-101	8977
hsa-miR-129-5p	8557
hsa-miR-181d	7966
hsa-miR-30a	7923
hsa-miR-421	7492
hsa-miR-30d	7278
hsa-miR-151-3p	6683
hsa-miR-99a	6345
hsa-miR-151-5p	5722
hsa-miR-23a	5196
hsa-miR-137	5173
hsa-miR-432	4904
hsa-miR-135a	4843
hsa-let-7i	4659
hsa-let-7g	4526
hsa-miR-488	4472
hsa-miR-744	4439
hsa-let-7d	4439
hsa-miR-338-5p	3891
hsa-miR-16	3841
hsa-miR-185	3819
hsa-miR-138	3710
hsa-miR-25	3692
hsa-miR-3065-5p	3660
hsa-miR-100	3441
hsa-miR-324-5p	3132
hsa-miR-26b	3129
hsa-miR-379	3108
hsa-miR-95	3049
hsa-miR-29b	2953
hsa-miR-130a	2895
hsa-miR-107	2765
hsa-miR-328	2761
hsa-miR-218	2755
hsa-miR-24	2708
hsa-miR-132*	2648
hsa-miR-873	2592
hsa-miR-1180	2512
hsa-miR-424	2450
hsa-miR-423-3p	2295
hsa-miR-361-5p	2182
hsa-miR-382	1858
hsa-miR-451	1602
hsa-miR-93	1423
hsa-miR-139-5p	1395
hsa-miR-708	1358
hsa-miR-769-5p	1299
hsa-miR-378	1220
hsa-miR-98	1207
hsa-miR-126*	1129
hsa-miR-181c	1110
hsa-miR-381	1060
hsa-miR-874	1039
hsa-miR-9*	1021
hsa-miR-142-3p	1016
hsa-miR-330-3p	1008
hsa-miR-125b-2*	943
hsa-miR-28-3p	922
hsa-miR-140-3p	920
hsa-miR-340	910
hsa-miR-181a*	864
hsa-miR-130b	829
hsa-miR-487b	821
hsa-miR-222	799
hsa-miR-409-3p	798
hsa-miR-148a	791
hsa-miR-15a	745
hsa-miR-126	733
hsa-miR-145	715
hsa-miR-149	706
hsa-miR-323-3p	700
hsa-miR-486-5p	657
hsa-miR-134	647
hsa-miR-584	618
hsa-miR-30c	582
hsa-miR-484	576
hsa-miR-342-3p	561
hsa-miR-504	550
hsa-miR-106b	534
hsa-miR-369-3p	515
hsa-miR-146b-5p	512
hsa-miR-30e	493
hsa-miR-423-5p	484
hsa-miR-3184	483
hsa-miR-331-3p	475
hsa-miR-2392	442
hsa-miR-598	425
hsa-miR-495	389
hsa-miR-370	381
hsa-miR-186	372
hsa-miR-181c*	372
hsa-miR-431*	367
hsa-miR-29c*	344
hsa-miR-539	341
hsa-miR-212	330
hsa-miR-1301	316
hsa-miR-127-5p	315
hsa-miR-19b	288
hsa-miR-181a-2*	269
hsa-miR-135b	269
hsa-miR-340*	265
hsa-miR-197	262
hsa-miR-339-3p	261
hsa-miR-124*	254
hsa-miR-148b	254
hsa-miR-152	254
hsa-miR-20a	251
hsa-miR-935	246
hsa-miR-140-5p	241
hsa-miR-411*	236
hsa-miR-885-5p	232
hsa-miR-335*	226
hsa-miR-125b-1*	226
hsa-miR-146a	221
hsa-miR-329	220
hsa-miR-155	217
hsa-miR-136	217
hsa-miR-106b*	211
hsa-miR-3200-3p	211
hsa-miR-192	203
hsa-miR-361-3p	202
hsa-miR-543	201
hsa-miR-17	194
hsa-miR-2964a-5p	194
hsa-miR-335	190
hsa-miR-664*	187
hsa-miR-129-3p	187
hsa-miR-889	186
hsa-miR-885-3p	186
hsa-miR-136*	185
hsa-miR-193a-5p	182
hsa-miR-628-5p	182
hsa-miR-411	182
hsa-miR-330-5p	181
hsa-miR-532-5p	174
hsa-miR-154	167
hsa-miR-375	163
hsa-miR-30b	156
hsa-miR-27b*	156
hsa-miR-138-1*	153
hsa-miR-150	152
hsa-miR-28-5p	147
hsa-miR-1247	146
hsa-miR-770-5p	145
hsa-miR-15b	144
hsa-miR-708*	143
hsa-miR-30c-2*	140
hsa-miR-454	137
hsa-miR-323b-3p	135
hsa-miR-758	131
hsa-miR-1296	130
hsa-miR-652	130
hsa-miR-379*	127
hsa-miR-33a	124
hsa-miR-195	123
hsa-miR-369-5p	123
hsa-miR-7-1*	122
hsa-miR-139-3p	121
hsa-miR-1	119
hsa-miR-664	117
hsa-miR-410	116
hsa-miR-29a*	114
hsa-miR-376c	104
hsa-miR-769-3p	100
hsa-miR-105	100
hsa-miR-23c	95
hsa-miR-485-3p	94
hsa-miR-378c	93
hsa-miR-490-3p	89
hsa-miR-29b-1*	89
hsa-miR-625*	85
hsa-miR-374a	85
hsa-miR-210	83
hsa-miR-767-5p	83
hsa-miR-1307	83
hsa-miR-20b	81
hsa-miR-532-3p	81
hsa-miR-138-2*	81
hsa-miR-153	81
hsa-miR-363	80
hsa-miR-3615	75
hsa-miR-425*	74
hsa-miR-654-5p	73
hsa-miR-660	72
hsa-miR-4482	70
hsa-miR-184	69
hsa-miR-654-3p	68
hsa-miR-941	68
hsa-miR-190	67
hsa-miR-592	66
hsa-miR-422a	66
hsa-miR-671-3p	66
hsa-let-7d*	65
hsa-miR-3065-3p	64
hsa-miR-19a	62
hsa-miR-377	61
hsa-miR-1912	60
hsa-miR-301a	59
hsa-miR-204	56
hsa-miR-497	55
hsa-miR-182	52
hsa-miR-99a*	52
hsa-miR-376a	52
hsa-miR-496	49
hsa-miR-4443	49
hsa-miR-187	49
hsa-miR-1286	47
hsa-miR-4510	46
hsa-miR-29b-2*	44
hsa-miR-144	44
hsa-miR-99b*	43
hsa-miR-193b	43
hsa-miR-200c	42
hsa-miR-485-5p	41
hsa-miR-2682	41
hsa-miR-628-3p	39
hsa-miR-106a	39
hsa-miR-125a-3p	38
hsa-miR-589	37
hsa-miR-185*	37
hsa-miR-3943	37
hsa-miR-720	35
hsa-miR-574-5p	32
hsa-miR-374a*	32
hsa-miR-491-5p	32
hsa-miR-299-3p	32
hsa-miR-450a	31
hsa-miR-339-5p	31
hsa-miR-500a	31
hsa-miR-194	31
hsa-miR-541	30
hsa-miR-766	30
hsa-miR-2276	30
hsa-miR-582-3p	29
hsa-miR-3074-5p	29
hsa-miR-493*	29
hsa-miR-193b*	28
hsa-miR-501-3p	27
hsa-miR-218-2*	27
hsa-miR-324-3p	27
hsa-miR-490-5p	26
hsa-miR-1179	26
hsa-miR-34a	25
hsa-miR-362-5p	25
hsa-miR-323-5p	25
hsa-miR-18a	24
hsa-miR-1270	24
hsa-miR-376b	24
hsa-miR-30d*	24
hsa-miR-574-3p	24
hsa-miR-199a-5p	23
hsa-miR-183	23
hsa-let-7a*	23
hsa-miR-487a	23
hsa-miR-431	23
hsa-miR-1224-5p	23
hsa-miR-376a*	23
hsa-miR-582-5p	23
hsa-miR-144*	22
hsa-miR-345	22
hsa-miR-377*	22
hsa-miR-320b	21
hsa-miR-3135b	21
hsa-miR-668	20
hsa-miR-1285	20
hsa-miR-455-5p	19
hsa-miR-200b	19
hsa-miR-301b	19
hsa-miR-3605-3p	19
hsa-miR-223	18
hsa-miR-129*	18
hsa-miR-188-5p	18
hsa-miR-154*	18
hsa-miR-505	18
hsa-miR-326	18
hsa-miR-3177-3p	18
hsa-miR-1287	18
hsa-miR-655	17
hsa-miR-2681	17
hsa-miR-374b*	17
hsa-miR-221*	17
hsa-miR-365	17
hsa-miR-455-3p	17
hsa-miR-130b*	16
hsa-miR-32	16
hsa-miR-1271	16
hsa-miR-191*	16
hsa-miR-3928	16
hsa-miR-1468	16
hsa-miR-4446-3p	15
hsa-miR-30b*	15
hsa-miR-425	15
hsa-miR-214	15
hsa-let-7i*	14
hsa-miR-143*	14
hsa-miR-2110	14
hsa-miR-337-5p	14
hsa-miR-744*	14
hsa-miR-887	13
hsa-miR-552	13
hsa-miR-22*	13
hsa-miR-891a	12
hsa-let-7b*	12
hsa-miR-1298	12
hsa-miR-491-3p	12
hsa-miR-503	12
hsa-miR-211	12
hsa-miR-331-5p	12
hsa-miR-509-3p	12
hsa-miR-199b-5p	11
hsa-miR-34c-5p	11
hsa-miR-629	11
hsa-miR-760	11
hsa-miR-346	11
hsa-miR-4742-3p	11
hsa-miR-505*	11
hsa-miR-33b	11
hsa-miR-450b-5p	10
hsa-miR-3687	10
hsa-miR-378d	10
hsa-miR-1249	10
hsa-miR-1260b	10
