# Supplementary material for: Reduced Expression of Brain-Enriched microRNAs in Glioblastomas Permits Targeted Regulation of a Cell Death Gene
Source: PLoS One. 2011 Sep 2;6(9):e24248. doi: 10.1371/journal.pone.0024248 (PMC3166303; doi:10.1371/journal.pone.0024248)
Supplement: Table S4 — RPKM scores for nine deep sequencing libraries. (XLSX) [file pone.0024248.s013.xlsx]

## Sheet: TableS4
Table S4: RPKM Scores for Nine Deep Sequencing Libraries
miRNA	G3182	G3183	G3346	G3508	G3522	G4562	N3032	N3034	N4577	Mean RPKM GBM	Mean RPKM NB
hsa-miR-124	63.9189	44.0273	0.876981	4.09505	4.65483	1.09492	6842.54	22598.8	17384.8	19.778	15608.7
hsa-miR-128	274.155	65.7022	18.8551	26.6179	34.5233	17.8837	4561.39	9291.26	35605.7	72.9561	16486.1
hsa-miR-218	3.02933	2.93515	0	5.11882	0.775805	1.09492	232.429	36.7622	1058.59	2.159	442.593
hsa-miR-873	17.5701	2.70937	0	2.04753	0	0	195.072	1428.16	205.663	3.72117	609.631
hsa-miR-139-3p	0.9088	0.225781	0	0	0	0	22.333	40.3109	11.052	0.189097	24.5653
hsa-miR-383	305.357	26.4164	0.43849	45.0456	207.14	2.55481	2413.78	29390	55.2599	97.8254	10619.7
hsa-miR-7	62.7072	53.9616	10.5238	26.6179	5.81854	8.75936	3427.42	1857.59	852.444	28.0647	2045.82
hsa-miR-1912	1.21173	0	0	0	0	0	0.455775	9.87207	22.5845	0.201956	10.9708
hsa-miR-138-2star	1.21173	0.451562	0	0	0	0	34.3903	3.29069	0.961042	0.277216	12.8807
hsa-miR-1286	0.605867	0	0	1.02376	0	0	2.27887	23.8575	6.24677	0.271605	10.7944
hsa-miR-139-5p	42.7136	1.35468	0.876981	0	1.16371	0	155.875	441.775	247.949	7.68483	281.866
hsa-miR-107	53.5794	5.50079	1.39248	17.4562	9.74332	4.5806	113.222	584.82	928.869	15.3755	542.303
hsa-miR-485-5p	0.302933	0.677342	0	0	0.387903	0.364973	10.9386	13.1628	0.480521	0.288859	8.19396
hsa-miR-137	49.6811	79.4748	24.5555	31.7367	1.93951	3.64973	2200.48	190.037	54.7794	31.8395	815.099
hsa-miR-138	129.655	2.48359	2.63094	109.543	6.98225	0.729946	148.583	2405.49	221.04	42.0042	925.039
hsa-miR-490-3p	4.24107	0.677342	0	0	0.387903	0	16.8637	37.0202	3.36365	0.884385	19.0825
hsa-miR-543	4.84693	2.25781	0.43849	0	2.32742	1.82487	38.7408	61.7004	19.7014	1.94925	40.0475
hsa-miR-504	15.4496	1.1289	0.43849	12.2852	3.10322	0	145.392	172.761	10.0909	5.4009	109.415
hsa-miR-323-3p	14.5408	3.61249	0.43849	4.09505	17.0677	5.10963	95.2569	261.61	83.1302	7.47736	146.666
hsa-miR-495	5.75573	0.225781	0	0	15.5161	0.364973	7.29239	46.0696	152.325	3.64377	68.5624
hsa-miR-490-5p	1.8176	0	0	0	0	0	4.10197	10.6947	1.92208	0.302933	5.57293
hsa-miR-424	29.0816	14.2242	3.50792	35.8317	17.8435	29.5628	48.3121	41.1336	1102.32	21.6753	397.254
hsa-miR-487b	9.088	6.54764	1.31547	0	10.0855	18.2487	269.363	74.8632	66.7924	7.54754	137.006
hsa-miR-132	2011.78	392.407	176.712	836.415	488.37	166.793	9379.84	11208.1	12407.5	678.746	10998.5
hsa-miR-124star	19.9936	1.1289	0.43849	0	1.55161	0	21.8772	131.628	22.104	3.8521	58.5362
hsa-miR-485-3p	1.51467	1.58047	0	0	0.775805	3.28476	26.8907	23.0348	3.36365	1.19262	17.7631
hsa-miR-103a	2588.89	646.821	716.893	1369.77	1829.71	904.668	9660.28	20986.8	28935.3	1342.79	19860.8
hsa-miR-103b	2588.89	646.821	716.893	1369.77	1829.71	904.668	9660.28	20986.8	28935.3	1342.79	19860.8
hsa-miR-1270	0.302933	0.225781	0	0	0.387903	1.09492	5.4693	7.40405	1.44156	0.335256	4.77164
hsa-miR-541	0.605867	0	0.43849	0	1.16371	0.364973	7.29239	9.87207	0.961042	0.42884	6.04183
hsa-miR-132star	145.105	2.25781	0.43849	131.042	34.9112	1.82487	56.9718	1990.87	49.4937	52.5965	699.111
hsa-miR-1224-5p	1.51467	0.225781	0	0	0.387903	0.364973	4.10197	11.5174	0	0.415554	5.20646
hsa-miR-410	2.42347	3.38671	0	0	0	4.74465	35.0946	25.5028	3.84417	1.75914	21.4806
hsa-miR-212	3.33227	7.90233	11.8392	3.07129	2.32742	2.55481	87.0529	78.9765	20.6624	5.17123	62.2306
hsa-miR-431star	28.4757	1.80625	0	5.11882	8.53386	1.09492	53.3256	199.087	3.84417	7.50493	85.4188
hsa-miR-668	0.9088	1.1289	0	0	0.387903	0	2.73465	9.87207	0.961042	0.404268	4.52259
hsa-miR-375	6.66453	1.1289	0.876981	11.2614	0.775805	0.729946	17.7752	94.6073	4.32469	3.57293	38.9024
hsa-miR-323b-3p	10.2997	0.451562	0	0	4.65483	1.09492	15.9521	51.8283	17.7793	2.75017	28.5199
hsa-miR-433	1157.51	19.6429	0	94.1863	318.08	10.9492	529.154	7279.83	49.4937	266.728	2619.49
hsa-miR-770-5p	7.2704	1.58047	0	0	1.55161	5.83957	45.5775	27.1482	5.76625	2.70701	26.164
hsa-miR-431	0.605867	0.225781	0	2.04753	0.775805	0	0	15.6308	1.92208	0.609163	5.85095
hsa-miR-379	124.506	39.0601	0.876981	63.4733	105.897	68.615	731.062	923.861	183.079	67.0714	612.667
hsa-miR-154star	0.9088	0.225781	0	0	0.387903	0.729946	5.4693	4.11336	0.480521	0.375405	3.35439
hsa-miR-487a	0.302933	0.677342	0	1.02376	0	0.729946	8.65972	2.46802	0.480521	0.455664	3.86942
hsa-miR-330-3p	43.9253	28.6742	13.5932	44.0218	3.87903	12.4091	237.459	332.36	39.8833	24.4171	203.234
hsa-miR-885-5p	2.7264	16.7078	4.82339	0	2.71532	1.82487	79.7606	20.5668	15.3767	4.79963	38.568
hsa-miR-376astar	1.21173	0.677342	0	0	0	1.09492	8.20394	3.29069	0.480521	0.497333	3.99172
hsa-miR-625	0.318877	0	0.511572	0	0	0.425802	1.05179	3.98347	0	0.209375	1.67842
hsa-miR-138-1star	6.96747	2.03203	3.06943	8.19011	0.775805	1.82487	41.2683	28.7935	13.4546	3.80995	27.8388
hsa-miR-539	22.72	0.225781	0	16.3802	24.05	0	2.27887	160.421	67.7535	10.5627	76.8178
hsa-miR-889	8.48213	3.83827	0.43849	1.02376	10.0855	4.37968	53.7814	38.6656	10.0909	4.70797	34.1793
hsa-miR-496	0.302933	0.451562	0	0	3.10322	3.28476	18.6868	6.58138	0	1.19041	8.42271
hsa-miR-342-3p	4.24107	12.1922	19.2936	21.499	5.04274	18.6136	66.5431	47.715	171.546	13.4804	95.268
hsa-miR-628-5p	5.4528	6.09608	1.31547	7.16635	4.26693	4.01471	58.7949	33.7296	5.76625	4.71872	32.7636
hsa-miR-767-5p	5.75573	0.225781	0	4.09505	1.93951	1.09492	27.8023	11.5174	3.84417	2.18517	14.3879
hsa-miR-411star	13.3291	4.28983	0.43849	6.701	8.53386	11.8414	39.2715	78.6094	27.675	7.52227	48.5186
hsa-miR-136	4.544	1.1289	0.43849	13.3089	9.69757	4.74465	18.6868	13.9854	76.4029	5.64376	36.3583
hsa-miR-188-5p	0.9088	0	0	3.07129	0	0.364973	0	12.3401	1.44156	0.724177	4.59388
hsa-miR-4446-3p	0.9088	2.48359	0	0	0	0	2.27887	7.40405	0.480521	0.565398	3.38781
hsa-miR-95	162.978	178.141	67.089	90.0912	58.9612	33.2126	441.19	620.295	637.652	98.4122	566.379
hsa-miR-421	777.024	28.4484	7.89283	397.22	981.782	11.6791	40.1082	6068.03	13.4546	367.341	2040.53
hsa-miR-2681	1.21173	1.1289	0	1.02376	0	0.364973	4.55775	5.75871	0	0.621562	3.43882
hsa-miR-301b	0.9088	0.451562	0	0	1.16371	1.45989	3.6462	4.93603	2.40261	0.663994	3.66161
hsa-miR-769-3p	4.544	3.38671	2.19245	5.11882	2.32742	2.55481	33.7273	19.7441	0.961042	3.35404	18.1442
hsa-miR-935	17.5701	0.225781	8.33132	1.02376	29.0927	4.74465	37.8293	111.883	12.9741	10.1647	54.2289
hsa-miR-329	31.2021	0.903123	0	5.11882	17.4556	4.01471	21.8772	120.11	12.4935	9.7824	51.4936
hsa-miR-744	514.684	51.478	57.0037	295.868	181.151	78.1043	412.476	2377.52	309.456	196.381	1033.15
hsa-miR-7-1star	0.9088	4.96718	5.26188	2.04753	0	8.75936	52.8699	3.29069	1.44156	3.65746	19.2007
hsa-miR-1273d	0.302933	0.225781	0	1.07251	0.387903	0	1.8231	3.29069	0	0.331522	1.7046
hsa-miR-149	40.896	16.482	24.9939	19.4515	17.4556	30.2928	210.568	126.692	43.2469	24.9286	126.835
hsa-miR-153	4.544	1.1289	3.50792	5.11882	3.49112	1.09492	6.83662	20.5668	19.7014	3.14761	15.7016
hsa-miR-1298	3.33227	0	0	0	0	0	1.8231	5.75871	0.480521	0.555378	2.68744
hsa-miR-324-3p	1.21173	1.80625	1.75396	0	1.93951	1.45989	2.73465	16.4534	0.480521	1.36189	6.5562
hsa-miR-380	0.302933	0.451562	0	0	0	0.729946	0.455775	1.64534	1.44156	0.247407	1.18089
hsa-miR-22	89.6683	4875.74	3605.27	672.613	80.6838	1711.72	13436.7	4170.13	8676.29	1839.28	8761.04
hsa-miR-369-5p	7.2704	4.06405	0	5.11882	6.20644	9.12433	31.9042	42.779	0.480521	5.29734	25.0546
hsa-miR-376b	0.302933	0.225781	0	0	0.387903	4.11029	1.8231	0.89746	9.1299	0.837818	3.95015
hsa-miR-328	253.555	25.5132	58.7577	281.535	179.987	39.0521	354.593	1588.58	24.9871	139.733	656.053
hsa-miR-628-3p	6.66453	0.451562	0	3.07129	3.10322	0	0.455775	29.6162	0.961042	2.2151	10.3443
hsa-miR-382	128.747	31.8351	0.876981	105.448	121.414	72.2647	242.928	454.115	371.443	76.7641	356.162
hsa-miR-299-3p	2.42347	0.903123	0.43849	1.02376	3.87903	1.09492	3.6462	17.2761	1.44156	1.62713	7.45463
hsa-miR-432	557.397	43.1241	2.63094	211.919	472.853	164.238	490.869	2365.18	457.456	242.027	1104.5
hsa-miR-654-5p	11.5115	1.1289	0	2.04753	6.59435	2.18984	8.20394	41.1336	2.40261	3.91201	17.2467
hsa-miR-885-3p	0	31.8351	5.26188	0	0	1.82487	70.6451	0	14.8962	6.48697	28.5137
hsa-miR-548i	0.302933	0	0.43849	0	0.387903	0	1.36732	1.0969	0	0.188221	0.821407
hsa-miR-370	61.1925	4.51562	0	11.2614	34.9112	8.39438	54.2372	190.86	14.4156	20.0459	86.5043
hsa-miR-1296	18.4789	2.70937	2.63094	5.11882	7.37015	4.74465	21.8772	60.0551	4.32469	6.84214	28.7523
hsa-miR-3943	9.39093	0	0	2.04753	1.16371	0	4.10197	21.3895	0.961042	2.10036	8.8175
hsa-miR-2113	0.605867	2.03203	0	0	0	0	1.36732	4.11336	0	0.439649	1.82689
hsa-miR-1	4.24107	4.06405	10.5238	5.11882	6.20644	4.74465	25.0676	37.8429	8.64938	5.81647	23.8533
hsa-miR-33a	12.7232	2.03203	7.01585	6.14258	7.75805	2.91979	7.74817	41.1336	27.3897	6.43192	25.4238
hsa-miR-127-3p	2025.72	500.782	30.2558	1282.78	1698.63	1649.31	7866.21	4149.56	2112.37	1197.91	4709.38
hsa-miR-23c	0	7.04262	11.0222	3.08813	0.778183	1.46252	40.9155	4.17461	0.480521	3.89894	15.1902
hsa-miR-491-5p	1.51467	3.16093	1.31547	3.07129	0	0.364973	8.20394	8.22672	1.92208	1.57122	6.11758
hsa-miR-219-2-3p	1723.69	64.2307	36.3947	4533.04	81.8719	289.418	3776.4	9045.94	60.4027	1121.44	4294.25
hsa-miR-592	4.84693	2.25781	0.43849	15.3565	0.775805	0.729946	7.29239	37.0202	2.40261	4.06757	15.5717
hsa-miR-552	1.8176	2.48359	0	0	0.387903	0	2.27887	6.58138	0	0.781515	2.95342
hsa-miR-2682	2.12053	6.32186	2.19245	1.02376	0	0.364973	12.7617	8.22672	1.44156	2.00393	7.47666
hsa-miR-1179	5.14987	0.451562	0	3.07129	1.93951	0	0.455775	15.6308	2.88313	1.76871	6.32322
hsa-miR-655	0	0	0	3.07129	0.775805	1.09492	0.455775	1.64534	6.7273	0.823669	2.9428
hsa-miR-29b-2star	6.66453	0.225781	0	8.19011	4.26693	0	2.27887	29.8681	1.44156	3.22456	11.1962
hsa-miR-411	19.9936	6.09608	0.876981	7.16635	25.9895	5.83957	38.2851	69.1045	6.7273	10.9937	38.0389
hsa-miR-29b	54.9589	236.111	84.2524	204.233	96.0002	174.992	965.12	166.528	309.687	141.758	480.445
hsa-miR-221	1241.42	89.4092	3511.87	6998.45	579.527	2777.81	6708.55	10015.2	9002.56	2533.08	8575.44
hsa-miR-760	0	1.1289	0.43849	1.02376	0	1.09492	3.19042	2.46802	0.480521	0.614346	2.04632
hsa-miR-491-3p	0	2.48359	0.876981	0	0	0	3.6462	0	1.92208	0.560095	1.85609
hsa-miR-338-5p	356.696	28.5976	22.574	875.81	40.0924	94.1337	1031.53	1232.71	78.0865	236.317	780.775
hsa-miR-324-5p	499.84	8.57967	7.45434	687.969	318.08	11.3142	27.8023	2468.84	33.6365	255.54	843.426
hsa-miR-379star	6.05867	3.38671	0	5.58416	12.4129	14.8017	28.1831	22.5793	18.9355	7.04069	23.2326
hsa-miR-105	10.9056	2.03203	0	10.2376	6.59435	2.18984	33.7273	14.8081	3.84417	5.32657	17.4599
hsa-miR-129star	0	0	0	0	0	0	5.10148	2.62724	1.92208	0	3.21693
hsa-miR-377	5.4528	1.1289	0	7.16635	7.75805	2.55481	14.5848	23.0348	0.480521	4.01015	12.7
hsa-miR-488	825.796	20.3203	5.70037	974.623	469.75	4.74465	25.0676	3595.08	22.5845	383.489	1214.24
hsa-miR-598	21.5083	26.4164	16.6626	8.19011	40.3419	36.1323	63.3527	84.7352	87.9354	24.8753	78.6744
hsa-miR-3200-3p	47.2576	2.70937	2.63094	28.6654	20.1709	1.45989	13.2175	141.5	4.80521	17.149	53.1741
hsa-miR-374bstar	2.12053	1.80684	0.43849	2.04753	1.16371	0.364973	1.8231	9.87207	0.480521	1.32368	4.05856
hsa-miR-769-5p	75.7333	29.5773	42.0951	255.941	75.2531	31.3877	303.546	415.449	61.5067	84.9979	260.167
hsa-let-7d	195.694	440.382	248.55	146.706	220.698	406.771	817.96	877.687	766.377	276.467	820.675
hsa-miR-1247	4.24107	0.677342	0	48.1169	0.775805	8.75936	34.1831	58.4097	0	10.4284	30.8643
hsa-miR-346	1.51467	1.1289	0	1.02376	0.387903	0.729946	2.73465	4.11336	0	0.797531	2.28267
hsa-miR-409-3p	29.3845	11.9664	0.876981	147.422	75.2531	67.52	200.085	241.043	31.7144	55.4038	157.614
hsa-miR-126	17.5701	72.9272	14.0317	77.806	62.0644	36.4973	71.5566	120.933	206.144	46.8161	132.878
hsa-miR-381	114.812	16.7078	2.63094	64.4971	205.201	44.5267	224.697	325.778	82.1691	74.7291	210.881
hsa-miR-135a	513.761	83.5096	85.4538	303.034	690.467	167.692	35.0946	621.05	1932.44	307.32	862.86
hsa-miR-3177-3p	1.8176	0.225781	0.876981	4.09505	0.387903	1.09492	2.73465	8.22672	0.961042	1.41637	3.97414
hsa-miR-151-5p	517.997	422.971	320.975	691.926	315.594	341.347	1444.14	2127.33	63.9093	435.135	1211.79
hsa-miR-625star	5.73979	3.83827	5.62729	20.4753	0.775805	7.23864	26.2947	33.8595	0.480521	7.28251	20.2116
hsa-miR-744star	0.9088	1.35468	0.43849	3.07129	1.16371	0.729946	0.911549	9.04939	0.480521	1.27782	3.48049
hsa-miR-766	1.21173	2.25781	1.31547	2.04753	1.55161	3.28476	10.4828	4.11336	1.17173	1.94482	5.25597
hsa-miR-1180	345.344	30.2546	46.0415	462.741	379.369	117.521	323.144	1466	10.0909	230.212	599.746
hsa-miR-2276	2.7264	1.58047	0.876981	9.21387	2.32742	0.364973	1.36732	18.9215	1.92208	2.84835	7.40362
hsa-miR-326	0.302933	1.80625	0	6.14258	0	0.364973	4.10197	6.58138	0.480521	1.43612	3.72129
hsa-miR-127-5p	41.5019	8.57967	0.43849	38.903	36.8508	20.4385	68.822	98.7207	21.1429	24.4521	62.8952
hsa-miR-377star	2.12053	0	0	4.09505	3.49112	1.45989	4.55775	9.04939	0.480521	1.8611	4.69589
hsa-miR-323b-5p	2.12053	0.225781	0	0	0.775805	0	2.27887	1.64534	0	0.520353	1.30807
hsa-miR-203	1.51467	0.451562	0	4.09505	0.775805	0	2.27887	5.75871	0.480521	1.13951	2.83937
hsa-miR-129-5p	778.236	95.0537	5.26188	127.97	3450.78	4.74465	1661.3	3610.71	251.313	743.675	1841.11
hsa-miR-191	620.105	651.152	1232.6	1245.92	764.556	512.057	1720.55	3933.2	476.196	837.731	2043.31
hsa-miR-363	9.69387	6.9992	1.75396	12.2852	8.14596	8.02941	10.027	43.6016	2.40261	7.81793	18.6771
hsa-miR-143	3574.61	8747.42	1137.44	32304.9	8467.14	2407.73	14375.1	45197.6	7622.03	9439.87	22398.3
hsa-miR-134	86.0331	17.3851	0.876981	107.495	72.5378	65.6952	63.3527	250.915	97.5458	58.3372	137.271
hsa-miR-4787-3p	0.9088	0.903123	0	0	0.387903	0.364973	1.36732	1.64534	0	0.427467	1.00422
hsa-miR-136star	11.2085	3.38671	0	24.5703	37.2387	12.7741	42.387	41.1336	20.1819	14.863	34.5675
hsa-miR-29c	116.65	15142.7	28183.9	1211.64	335.915	21233.3	71455	447.479	2341.63	11037.4	24748
hsa-miR-181d	568.289	1085.99	660.564	174.249	443.995	1148.6	1270.96	1856.72	1427.69	680.282	1518.46
hsa-miR-191star	1.21173	1.1289	1.31547	2.04753	0.775805	1.09492	5.4693	2.46802	0.480521	1.26239	2.80594
hsa-miR-2392	25.4464	21.9007	2.19245	148.446	16.2919	17.1537	56.9718	111.883	87.4548	38.5718	85.4367
hsa-miR-130a	197.727	66.2544	478.345	371.394	340.532	139.283	155.875	901.778	702.675	265.589	586.776
hsa-miR-181b	6382.62	3007.58	1495.37	5808.86	3377.35	3349.26	4714.31	17755.8	3096.74	3903.51	8522.28
hsa-let-7e	1667.95	12873.4	1185.84	1041.08	1997.79	4532.71	11154.4	7476.47	6503.38	3883.12	8378.09
hsa-miR-331-3p	39.0784	92.3443	7.01585	79.8536	22.8863	6.56952	147.215	110.238	8.64938	41.2913	88.7009
hsa-miR-708	39.9872	145.854	174.958	68.5922	25.9895	174.822	338.641	100.366	236.897	105.034	225.301
hsa-miR-3928	0.9088	2.25781	2.19245	2.04753	1.55161	1.09492	1.36732	7.40405	1.92208	1.67552	3.56449
hsa-miR-24	200.94	917.198	1296.16	852.164	522.076	896.825	2173.19	1113.08	1602.4	780.893	1629.56
hsa-miR-98	26.7268	242.378	75.9964	30.7621	41.6061	156.817	320.368	80.9818	197.161	95.7144	199.504
hsa-miR-671-3p	9.39093	6.32186	4.3849	13.3089	7.37015	4.37968	9.57127	33.7296	1.92208	7.52608	15.0743
hsa-miR-23b	116.971	1832.24	3504.96	366.449	444.176	2251.42	7845.46	518.221	103.11	1419.37	2822.26
hsa-miR-30bstar	1.21173	0.225781	0.43849	6.14258	3.10322	1.09492	0.455775	11.5174	0	2.03612	3.99106
hsa-miR-3065-5p	1576.82	79.0233	134.617	1316.77	110.837	156.024	1141.11	1911.25	231.85	562.347	1094.74
hsa-miR-376a	4.544	2.03203	0	7.16635	3.87903	11.5836	14.129	8.97461	5.28573	4.86749	9.46312
hsa-miR-15a	82.3686	23.1667	27.6249	142.303	161.317	35.7674	12.3059	237.752	206.897	78.758	152.318
hsa-miR-376c	10.2997	2.70937	0	8.19011	15.1282	25.1832	26.4349	20.5668	10.0909	10.2518	19.0309
hsa-miR-4510	3.96296	5.44289	7.04223	2.05383	4.28903	6.97045	9.16823	13.2344	4.83119	4.96023	9.07793
hsa-miR-584	69.9776	5.64452	4.3849	378.793	16.2919	12.4091	79.3048	362.798	1.44156	81.2501	147.848
hsa-miR-125b	92965.7	17040.6	18436.8	38908.1	60481.8	33642.9	19756	63444.5	154165	43579.3	79121.9
hsa-miR-664star	18.176	13.7726	10.9623	58.3545	27.1532	14.5989	27.8023	97.0753	3.84417	23.8363	42.9072
hsa-miR-425	0.302933	0.903123	2.19245	1.02376	1.55161	2.91979	0.911549	1.64534	5.28573	1.48228	2.61421
hsa-miR-1301	25.1435	18.9656	35.9562	55.2832	39.5661	43.4318	73.8355	103.657	13.4546	36.3911	63.6489
hsa-miR-340	59.3749	68.6374	128.478	252.87	39.1782	52.5561	238.37	243.511	43.7274	100.182	175.203
hsa-miR-652	2.7264	7.90233	22.8015	18.4277	5.43064	29.5628	41.9313	30.4389	0.480521	14.4752	24.2836
hsa-let-7g	359.088	411.48	477.289	599.511	909.661	292.201	711.496	941.688	886.453	508.205	846.546
hsa-miR-129-3p	29.6875	3.38671	0.43849	1.02376	86.1144	0.364973	47.7684	24.5209	26.9092	20.1693	33.0662
hsa-miR-30estar	1331.49	3129.5	621.055	2878.09	1824.74	597.067	1865.88	6338.04	259.159	1730.33	2821.03
hsa-miR-4742-3p	3.33227	0.451562	0.43849	2.04753	2.32742	0.729946	1.8231	5.75871	0	1.55453	2.52727
hsa-miR-1260b	5.53183	18.0768	3.2156	3.89769	0.869047	2.05297	25.1588	2.05668	0	5.60733	9.07181
hsa-miR-15b	8.81435	14.9902	9.64679	27.6416	24.1004	9.4893	2.73465	16.4534	56.9088	15.7804	25.3656
hsa-miR-758	17.5701	2.93515	0	36.8555	30.6443	13.504	20.9656	46.8923	13.4546	16.9182	27.1042
hsa-miR-3184	167.498	14.1675	32.5989	379.066	228.89	115.96	44.0482	704.552	2.54473	156.363	250.382
hsa-miR-185	145.408	286.967	407.796	1071.88	94.6483	527.021	1204.16	551.19	243.624	422.287	666.324
hsa-miR-425star	7.87627	3.16093	2.19245	42.9981	5.04274	2.18984	10.027	33.7296	5.28573	10.5767	16.3474
hsa-miR-27bstar	10.6027	17.6109	24.9939	36.8555	14.3524	7.66444	41.4755	31.2615	12.9741	18.68	28.5704
hsa-miR-551bstar	0.605867	1.80625	2.19245	1.02376	0.775805	0	3.19042	1.64534	0	1.06736	1.61192
hsa-miR-3192	1.21173	0.677342	0	2.04753	1.16371	0	1.36732	2.46802	0	0.850052	1.27845
hsa-miR-200a	0.9088	0.451562	0.43849	2.04753	2.32742	1.09492	0.455775	4.93603	0	1.21145	1.79727
hsa-miR-181a	183161	49000.4	21191.9	88686.4	91823.8	46953.5	79881.3	234519	41070.8	80136.1	118490
hsa-miR-423-3p	448.928	156.968	330.91	975.171	744.358	778.589	701.138	1788.6	42.6243	572.487	844.121
hsa-miR-125b-1star	49.984	13.9984	38.1487	57.3308	26.7653	22.2634	24.6118	108.593	19.2208	34.7484	50.8085
hsa-miR-221star	1.51467	0.451562	5.26188	4.09505	0.387903	1.09492	5.4693	3.29069	0.480521	2.13433	3.08017
hsa-miR-340star	31.2021	14.6758	14.4702	109.543	35.2991	24.4532	48.7679	97.898	18.7403	38.2739	55.1354
hsa-miR-30c-1star	0.605867	2.48359	0.876981	3.07129	0	0.729946	2.27887	3.29069	0	1.29461	1.85652
hsa-miR-874	658.577	17.8367	1.31547	288.694	29.0927	1.82487	163.623	511.702	27.8702	166.223	234.398
hsa-miR-654-3p	8.78507	3.61249	0	11.2614	19.3951	12.4091	10.4828	16.4534	12.013	9.24386	12.9831
hsa-miR-361-5p	126.323	195.978	232.4	494.478	252.525	532.131	561.059	642.507	81.6886	305.639	428.418
hsa-miR-3074-5p	0.813523	27.2435	18.4355	18.0352	3.09654	17.7981	58.735	0	1.09679	14.2371	19.9439
hsa-miR-708star	24.5376	9.93435	14.9087	52.2789	27.5411	10.5842	18.2422	69.9533	8.64938	23.2975	32.2816
hsa-miR-503	3.02933	0.903123	0	2.04753	1.55161	1.09492	4.10197	0.822672	0.961042	1.43775	1.9619
hsa-miR-29b-1star	29.3845	0.903123	1.31547	53.2357	24.05	1.45989	2.73465	67.6827	0.962531	18.3914	23.7933
hsa-miR-125a-5p	1038.46	2062.28	1467.63	3907.71	1523.29	1998.59	3671.26	2801.2	1274.82	1999.66	2582.43
hsa-miR-1292	0.9088	1.1289	2.63094	1.02376	1.16371	0.364973	1.36732	3.29069	0	1.20352	1.55267
hsa-miR-125a-3p	2.42347	11.289	7.01585	6.14258	1.16371	8.02941	5.4693	12.3401	5.28573	6.01068	7.69837
hsa-miR-369-3p	127.232	0.451562	0	149.469	245.155	4.37968	7.74817	214.717	113.884	87.7812	112.116
hsa-miR-30astar	2008.34	9085.9	1069.82	3290.31	1631.47	621.211	2064.26	8269.32	860.934	2951.18	3731.5
hsa-miR-154	12.1173	8.57967	0.876981	36.8555	46.9362	42.3369	44.2101	35.3749	12.9741	24.6171	30.853
hsa-miR-4482	1.21173	8.12811	16.2241	0	0	26.643	18.6868	0	13.9351	8.70117	10.874
hsa-miR-181c	95.1211	79.4748	75.8588	70.6413	634.237	129.201	170.46	366.089	139.832	180.756	225.46
hsa-let-7f	5082.93	25306.2	12790.3	4269.42	8232.54	14656.2	24348.2	9163.54	9913.19	11722.9	14475
hsa-miR-26a	123989	212678	85961.9	25538.9	31568.3	126971	275478	56139.7	33752.5	101118	121790
hsa-miR-1249	1.8176	0.451562	0	8.19011	0.387903	0.729946	1.8231	4.93603	0	1.92952	2.25304
hsa-let-7a	54759.6	176819	60546.3	13012.3	64819.3	131560	124524	78492.7	88073.1	83586.1	97029.9
hsa-miR-331-5p	1.21173	1.1289	1.75396	2.04753	1.55161	4.37968	3.19042	3.29069	0.480521	2.01224	2.32054
hsa-miR-27b	5398.95	5331.26	13792	8215.01	17278.2	5179.38	20738.5	10421.8	578.339	9199.13	10579.5
hsa-miR-99b	2234.54	3013.79	1222.73	4150.96	3294.65	2215.03	2472.12	6308.71	416.313	2688.62	3065.71
hsa-miR-509-3p	0.9088	0.451562	0	2.04753	10.4734	0	2.73465	4.93603	0	2.31354	2.55689
hsa-miR-145	3.6352	169.787	86.8211	166.873	45.3846	172.632	288.961	44.4243	21.1429	107.522	118.176
hsa-miR-422a	2.79335	0.970232	1.79659	57.1278	0	1.10255	8.47835	1.85562	24.6699	10.6317	11.6679
hsa-miR-1251	0.9088	3.16093	2.19245	0	0.775805	2.18984	0.911549	4.11336	0	1.53797	1.67497
hsa-miR-148b	22.2842	46.6655	20.0796	52.8774	64.3554	49.6812	76.1144	44.0282	17.4417	42.6572	45.8614
hsa-miR-330-5p	34.5344	1.35468	1.75396	185.301	3.10322	8.75936	19.1425	95.43	11.052	39.1345	41.8748
hsa-miR-130b	81.8807	25.4126	595.079	108.751	46.2068	83.7159	49.2237	240.914	206.471	156.841	165.536
hsa-miR-181cstar	166.257	1.80625	4.82339	88.1312	175.385	1.82487	3.19042	122.154	105.333	73.0379	76.8926
hsa-miR-505star	0	3.16093	3.50792	0	0.387903	2.55481	5.01352	0	0	1.60193	1.67117
hsa-let-7b	37217.3	62430.9	71133.1	17355.6	48401.5	87637.4	29855.5	27832	108623	54029.3	55436.8
hsa-miR-187	1.8176	0.451562	33.7638	1.02376	12.4129	9.85428	7.29239	17.2761	5.76625	9.88731	10.1116
hsa-miR-484	135.714	47.414	29.8173	359.341	167.574	86.1337	57.8834	350.458	11.052	137.666	139.798
hsa-miR-222	79.6715	10.3859	487.601	321.462	22.4984	84.3088	92.5222	315.083	102.351	167.655	169.986
hsa-miR-150	0.302933	84.442	0.43849	15.3565	7.37015	36.1323	59.2507	6.58138	6.7273	24.0071	24.1865
hsa-miR-888	1.21173	0.451562	1.31547	2.04753	0	0.729946	0	0	0	0.959373	0
hsa-miR-34b	0.605867	0.451562	1.75396	2.04753	1.16371	0	0	0	0	1.00377	0
hsa-miR-1276	0.302933	1.1289	2.19245	2.04753	0.387903	0	0	0	0	1.00995	0
hsa-miR-1269	0	0	0.876981	8.19011	0.387903	0	1.36732	3.29069	0	1.57583	1.55267
hsa-miR-125b-2star	347.162	134.34	97.7833	309.177	328.941	138.325	94.3453	527.333	45.6495	225.955	222.443
hsa-miR-151-3p	1239.91	323.318	594.154	5704.41	1065.18	548.19	906.536	3479.9	222.962	1579.19	1536.47
hsa-miR-378d	0.643957	0.237151	0.445904	10.7321	0	0.368563	0.946638	2.56307	2.4345	2.07127	1.9814
hsa-miR-9	323638	214434	187949	34573.5	300241	137612	113756	140997	310144	199741	188299
hsa-miR-219-5p	49.5296	0.677342	0	56.221	2.52137	0	0.000997235	50.5943	0	18.1582	16.8651
hsa-miR-101	2419.83	784.362	469.185	4296.74	3290.19	615.71	1422.02	3071.04	1021.11	1979.34	1838.05
hsa-miR-493star	7.2704	0.677342	0.43849	33.7842	1.55161	1.45989	3.19042	16.4534	0.961042	7.53032	6.8683
hsa-miR-513c	2.42347	0	0	3.07129	5.81854	0	0	4.93603	0	1.88555	1.64534
hsa-miR-192	55.1339	5.19296	16.2241	151.483	89.9934	24.0882	21.8772	122.578	3.36365	57.0193	49.273
hsa-miR-29a	483.03	35166.5	24263.4	1801.82	2264.4	32265.7	35508.7	1448.78	3621.89	16040.8	13526.4
hsa-miR-197	32.4139	26.1906	102.168	58.3545	15.5161	98.5428	82.951	42.779	13.4546	55.531	46.3948
hsa-miR-126star	143.287	51.7038	12.7162	1275.61	562.847	15.3289	53.3256	768.376	37.4806	343.582	286.394
hsa-miR-22star	0	4.06405	4.3849	5.11882	1.55161	2.91979	1.8231	3.29069	2.40261	3.00653	2.50546
hsa-miR-194	7.57333	3.83827	3.94641	11.2614	12.4129	10.5842	3.19042	13.9854	3.36365	8.26942	6.8465
hsa-miR-106a	10.9792	4.53358	1.50846	14.5135	20.9298	17.845	3.14484	19.3128	6.08558	11.7183	9.51439
hsa-miR-378c	5.53476	5.02476	13.7388	114.722	8.8122	7.66124	13.0265	13.5721	36.1421	25.9156	20.9136
hsa-miR-374b	3.02933	688.416	436.956	6.14258	3.49112	503.126	645.513	0.822672	0.720782	273.527	215.685
hsa-miR-4677-3p	0	0	3.94641	2.04753	1.16371	0.364973	0.455775	2.46802	0	1.25377	0.974597
hsa-miR-455-3p	2.12053	2.48359	1.75396	7.16635	6.20644	2.91979	6.38084	1.64534	0.480521	3.77511	2.83557
hsa-miR-152	17.4	20.4579	68.9849	145.787	100.248	39.4171	36.9177	60.9497	49.0132	65.3825	48.9602
hsa-miR-135b	25.7638	12.4472	11.4526	23.5466	98.9152	193.266	1.8231	17.3432	117.467	60.8986	45.5446
hsa-miR-1226	1.8176	2.25781	1.31547	6.14258	5.43064	1.09492	0.911549	5.75871	0	3.00984	2.22342
hsa-miR-335	4.24107	60.0577	168.146	10.2376	1.16371	19.7086	43.7544	19.7441	33.6365	43.9258	32.3783
hsa-miR-3960	1.21173	0.225781	0.43849	5.11882	1.16371	0	0	0	0	1.35976	0
hsa-miR-30dstar	3.33478	9.94837	7.46041	9.21387	5.82268	3.65187	5.93291	7.41437	0.962652	6.572	4.76998
hsa-let-7c	43426	60018.5	26153	4884.78	72661.8	56706.3	24171.5	19699.9	50615	43975.1	31495.4
hsa-miR-33b	2.12053	0.225781	2.63094	10.2376	0.775805	3.28476	2.27887	4.11336	0.480521	3.21258	2.29092
hsa-miR-34c-3p	0	5.41874	3.50792	0	0.775805	1.45989	2.27887	1.64534	0	1.86039	1.30807
hsa-miR-26b	315.042	1164.15	1021.4	698.082	612.457	996.32	1055.86	548.183	73.7513	801.241	559.264
hsa-miR-1307	13.3291	3.16093	14.0317	99.3051	9.69757	8.02941	19.1425	29.6162	2.40261	24.5923	17.0538
hsa-miR-301a	9.088	5.8703	45.1645	12.2852	15.904	10.5842	14.129	15.6308	4.32469	16.4827	11.3615
hsa-miR-378	60.3997	61.0505	330.863	2107.57	63.3377	104.374	245.544	230.456	452.83	454.6	309.61
hsa-miR-190	15.4496	1.58047	1.75396	119.78	19.3951	0	3.19042	48.5377	0.480521	26.3266	17.4029
hsa-let-7gstar	0.605867	0.225781	3.50792	1.02376	1.55161	1.09492	1.8231	0.822672	0	1.33498	0.881924
hsa-miR-374a	4.24107	31.246	32.9175	31.7367	12.4129	20.4385	32.469	9.04939	1.44156	22.1654	14.32
hsa-miR-30d	1606.79	2671.21	2560.67	2092.29	3532.68	1382.46	1127.12	2284.4	998.647	2307.68	1470.06
hsa-miR-941	12.7232	16.7078	18.4166	56.307	13.9645	12.4091	15.4963	23.0348	2.88313	21.7547	13.8048
hsa-miR-4443	12.7232	4.06405	0	92.1387	4.65483	0.364973	5.01352	30.4389	0.480521	18.991	11.9776
hsa-miR-181astar	843.117	6.09608	1.75396	942.799	383.971	1.45989	7.74817	634.705	37.8618	363.199	226.772
hsa-miR-548b-3p	0.302933	1.80625	0.876981	1.02376	1.16371	0.729946	1.8231	0	0	0.98393	0.607699
hsa-miR-629	0.302933	4.28983	13.1547	1.02376	1.55161	6.93449	0.911549	7.40405	0	4.54289	2.77187
hsa-miR-937	1.21173	0.677342	1.31547	9.21387	0.387903	0.729946	0	4.11336	0	2.25604	1.37112
hsa-miR-676	1.21173	1.1289	0	7.16635	0.387903	0	0.455775	2.46802	0	1.64915	0.974597
hsa-miR-99astar	13.9349	8.57967	8.76981	7.16635	48.0999	15.6938	3.19042	10.6947	15.3767	17.0408	9.75395
hsa-miR-574-3p	5.14987	2.48359	6.57735	22.5228	8.53386	3.28476	7.29239	6.58138	0	8.09204	4.62459
hsa-miR-1271	9.69387	1.58047	5.70037	11.2614	5.43064	4.37968	2.27887	7.40405	0.961042	6.34107	3.54799
hsa-miR-365	0.302933	3.83827	1.31547	12.2852	4.26693	8.75936	5.92507	1.64534	0.961042	5.12802	2.84382
hsa-miR-1285	4.544	1.58047	7.89283	26.6179	7.75805	5.83957	1.36732	13.1628	0.480521	9.0388	5.00353
hsa-let-7i	90.1704	866.333	4992.63	337.245	355.78	1864.1	575.022	304.387	1459.5	1417.71	779.637
hsa-miR-1468	4.24107	2.93515	0.43849	24.5703	7.37015	0.364973	2.73465	8.22672	0	6.65336	3.65379
hsa-miR-30c-2star	12.4203	161.885	17.1014	102.376	10.0855	17.8837	31.4484	53.4737	2.88313	53.6253	29.2684
hsa-miR-193bstar	7.2704	1.35468	3.94641	53.2357	11.2492	2.18984	1.8231	18.9215	0.480521	13.2077	7.07503
hsa-miR-345	2.12053	6.9992	19.2936	9.21387	2.32742	9.12433	6.38084	6.58138	0	8.17982	4.32074
hsa-miR-3605-3p	4.544	0.225781	4.82339	29.6891	6.98225	1.09492	2.73465	8.22672	1.44156	7.89325	4.13431
hsa-miR-140-3p	226.594	73.3788	119.269	575.355	1241.29	102.193	115.767	412.159	79.286	389.68	202.404
hsa-miR-29cstar	66.8717	18.4892	3.06943	645.989	113.845	31.0101	54.693	144.695	27.3897	146.546	75.5926
hsa-miR-545star	3.02933	0	0.43849	8.19011	4.65483	0	0	4.11336	0	2.71879	1.37112
hsa-miR-186	50.5899	56.2194	59.1962	702.302	44.9967	32.1176	85.2298	147.258	2.88313	157.57	78.4571
hsa-let-7dstar	7.57333	4.28983	10.9623	118.757	35.687	17.1537	6.83662	41.1336	0	32.4038	15.9901
hsa-miR-3135b	10.6027	25.2874	4.82339	6.14258	3.49112	2.18984	5.01352	7.40405	0.480521	8.75618	4.29936
hsa-miR-1343	1.51467	0	0	6.14258	1.16371	0	0.455775	1.64534	0	1.47016	0.700373
hsa-miR-1287	3.33227	4.7414	0	25.5941	5.81854	6.20454	4.10197	5.75871	0.961042	7.61514	3.60724
hsa-miR-193b	10.2997	9.03123	14.9087	53.2357	25.9895	9.85428	6.38084	20.5668	1.92208	20.5532	9.62324
hsa-miR-296-5p	0.302933	0	4.3849	4.09505	0.775805	3.28476	0	0	0	2.14058	0
hsa-miR-335star	6.05867	120.567	193.17	61.4258	0.775805	113.507	67.9104	25.5028	22.104	82.584	38.5057
hsa-miR-32	2.12053	6.32186	8.76981	10.2376	1.16371	8.02941	5.92507	2.46802	0	6.10716	2.7977
hsa-miR-582-5p	0.9656	0.677342	39.8745	6.14258	1.62919	0.486631	7.74817	1.64534	1.92208	8.29597	3.77187
hsa-miR-144	2.42347	6.77342	7.89283	82.9249	7.37015	17.5187	5.4693	18.0988	4.80521	20.8172	9.45776
hsa-miR-3065-3p	35.8583	25.1382	24.3445	40.2526	17.4202	22.8421	19.1758	18.4013	0	27.6427	12.5257
hsa-miR-542-3p	3.33227	0.225781	0.876981	10.2376	4.65483	1.09492	0.455775	4.11336	0	3.40374	1.52305
hsa-miR-30e	59.3313	197.745	129.684	439.211	325.832	112.149	60.2701	107.126	112.222	210.659	93.2062
hsa-miR-423-5p	140.561	8.35389	38.1487	1098.5	427.081	22.9933	15.4963	364.724	3.36365	289.273	127.861
hsa-miR-1261	4.24107	2.03203	0	7.16635	0	0	0.455775	2.46802	0	2.23991	0.974597
hsa-miR-664	1.8176	24.8359	46.0415	3.07129	6.98225	164.603	53.3256	0	0	41.2252	17.7752
hsa-miR-19b-1star	1.21173	0.225781	0	3.07129	1.55161	0	0.455775	0.822672	0	1.01007	0.426149
hsa-miR-200b	3.02933	6.82593	13.233	6.14258	7.47854	17.278	5.01352	5.21026	0.961042	8.99791	3.72827
hsa-miR-92a-1star	3.93813	0.903123	0.43849	6.14258	0	1.45989	1.8231	0.822672	0	2.14704	0.881924
hsa-miR-548c-5p	3.02933e-07	1.58785	0.43849	1.36502	0	1.09492	0.911549	0	0	0.747714	0.30385
hsa-miR-195	16.0581	145.266	52.7422	7.16635	43.4556	65.3968	32.9206	23.0348	11.0668	55.0142	22.3408
hsa-miR-211	4.84693	0	0	33.7842	0	1.09492	2.27887	5.75871	0	6.62101	2.67919
hsa-miR-505	4.24107	1.80625	7.89283	29.6891	10.0855	4.01471	1.8231	7.40405	2.40261	9.62158	3.87658
hsa-miR-615-3p	0	0.903123	10.0853	2.04753	1.93951	0	0	0	0	2.49591	0
hsa-miR-106bstar	192.969	63.4444	97.7833	197.586	102.406	99.2727	28.258	111.883	6.24677	125.577	48.7961
hsa-miR-589	4.544	17.3851	35.5177	40.9505	3.10322	11.3142	7.74817	10.6947	3.36365	18.8025	7.26885
hsa-miR-214	0.302933	1.80625	0.43849	40.9505	2.32742	0	1.8231	4.11336	2.88313	7.63761	2.93986
hsa-miR-454	86.0331	6.9992	46.48	189.396	207.916	21.8984	7.74817	96.2526	1.44156	93.1205	35.1475
hsa-miR-99bstar	20.5995	2.70937	6.13886	98.2813	28.7048	3.64973	2.73465	22.2121	4.80521	26.6806	9.91734
hsa-miR-582-3p	4.18427	0.677342	63.6093	19.4515	6.51677	0.973262	6.83662	9.87207	0.961042	15.9021	5.88991
hsa-miR-671-5p	0.302933	1.58047	6.13886	2.04753	0	1.82487	1.36732	0.822672	0	1.98244	0.729999
hsa-miR-184	2.7264	25.0617	188.551	4.09505	0.387903	0.364973	10.9386	18.9215	10.5715	36.8645	13.4772
hsa-miR-17	157.087	34.7942	57.3216	353.431	100.843	88.758	17.8208	102.5	23.7338	132.039	48.018
hsa-miR-28-5p	15.4496	39.7374	64.4581	55.3541	36.1148	289.778	34.2041	53.4737	3.36365	83.482	30.3471
hsa-miR-532-3p	22.72	16.482	74.5434	62.4496	20.9467	67.1551	23.2445	23.8575	0.480521	44.0495	15.8608
hsa-miR-30a	2156.29	7594.17	2018.11	7866.64	8019.45	983.192	831.232	3246.25	1070.7	4772.98	1716.06
hsa-miR-30b	10.6582	63.1686	127.171	55.5682	99.9148	132.896	35.2803	33.2444	18.7403	81.5629	29.0883
hsa-miR-140-5p	91.1829	4.51562	7.89283	482.193	437.942	7.66444	8.65972	158.776	13.9351	171.898	60.4569
hsa-miR-30c	47.505	718.259	250.369	144.066	280.23	456.9	137.914	128.822	60.5457	316.221	109.094
hsa-miR-9star	57.8603	1463.52	1309.78	85.9961	52.3669	112.777	306.281	134.918	88.8967	513.716	176.698
hsa-miR-19a	10.2997	14.0446	32.4923	92.2788	11.6371	32.9129	5.01352	8.22672	19.8669	32.2776	11.0357
hsa-miR-3647-3p	0.302933	0	0	11.2614	4.65483	1.45989	0	0	0	2.94651	0
hsa-miR-877	0.302933	1.80625	1.75396	6.14258	0.387903	0.364973	0.911549	0.822672	0	1.7931	0.578074
hsa-miR-34c-5p	1.51467	2.93515	5.70037	12.0122	15.5161	1.09492	2.73465	2.46802	0.961042	6.46223	2.05457
hsa-let-7astar	11.5115	4.06405	12.7162	49.1407	20.9467	7.66444	1.36732	13.9854	1.44156	17.6739	5.5981
hsa-miR-624star	0.302933	0.677342	2.63094	3.07129	1.16371	0.364973	0.455775	0.822672	0	1.36853	0.426149
hsa-let-7a-2star	9.088	0.903123	0.43849	5.11882	3.10322	0.729946	0	0	0	3.23027	0
hsa-miR-20b	40.0869	14.0413	11.0339	90.5642	117.539	81.404	9.11549	39.0002	6.7273	59.1116	18.281
hsa-let-7bstar	2.7264	2.03203	7.89283	31.7392	4.26693	6.93451	1.8231	5.75871	0.961053	9.26531	2.84762
hsa-miR-339-3p	27.8699	127.792	522.242	55.2832	42.2814	85.0388	96.6242	27.9709	7.20782	143.418	43.9343
hsa-miR-497	29.6875	12.1922	4.3849	22.5228	153.222	8.75936	4.10197	19.7441	10.5715	38.4614	11.4725
hsa-miR-200c	4.544	22.5256	60.8719	25.5941	19.2868	33.4532	12.3059	10.4205	1.44156	27.7126	8.056
hsa-miR-5096	1.51467	0.677342	2.19245	3.07129	1.16371	0.364973	0	0.822672	0.480521	1.49741	0.434398
hsa-miR-378star	1.51467	0.225781	1.31547	21.499	2.71532	1.82487	1.8231	1.64534	0.750359	4.84919	1.40627
hsa-miR-618	0	0.451562	2.63094	2.04753	0	1.45989	0.911549	0	0	1.09832	0.30385
hsa-miR-145star	1.21173	2.03203	1.31547	20.4753	3.49112	0.364973	2.27887	1.64534	0	4.8151	1.30807
hsa-miR-374astar	17.2672	10.6117	17.9781	63.4733	31.0322	8.75936	7.29239	12.3401	0.480521	24.8537	6.70433
hsa-miR-2964a-5p	16.9682	2.82615	0	1102.78	1.91513	17.1592	34.7867	116.155	2.06505	190.274	51.0023
hsa-miR-3615	24.2347	7.22498	19.2936	314.295	48.8757	10.9492	6.38084	48.5377	0.961042	70.8123	18.6265
hsa-miR-550a	0.344857	4.86738	12.2777	2.04753	0.775805	7.66444	2.27887	0.822672	0.480521	4.66296	1.19402
hsa-miR-193a-3p	0.302933	2.25781	3.06943	4.09505	0	5.10963	0.455775	0	1.44156	2.47248	0.632446
hsa-miR-20a	289.87	25.0485	56.5455	755.675	260.137	69.0906	13.6732	155.916	15.3767	242.728	61.6554
hsa-miR-660	16.6613	50.8007	85.0671	53.2357	32.9717	55.111	19.1425	8.22672	9.61042	48.9746	12.3266
hsa-miR-19b	65.4336	54.5927	291.552	582.381	77.5805	151.034	22.7887	33.7296	95.4581	203.762	50.6588
hsa-miR-26bstar	2.7264	2.93515	2.63094	17.404	12.4129	3.28476	1.8231	3.29069	0	6.89902	1.7046
hsa-miR-181a-2star	634.342	8.57967	7.01585	923.435	150.506	14.5989	0.911549	199.909	11.5325	289.746	70.7845
hsa-miR-148a	205.692	269.967	325.309	944.88	1063.88	1163.49	174.106	269.338	41.1819	662.204	161.542
hsa-miR-142-3p	59.9808	97.5373	171.45	3347.71	125.293	456.217	59.7065	46.8923	397.871	709.697	168.157
hsa-miR-2964a-3p	49.5296	0.677342	3.94641	833.43	2.52137	20.4385	56.5151	50.5943	0	151.757	35.7031
hsa-miR-92a	11327.4	5867.66	5558.58	11159.4	5534.74	10486.1	1564.62	3224.08	1068.76	8322.32	1952.49
hsa-miR-2114	0.9088	0.225781	3.06943	6.14258	15.1282	0.364973	0	0	0	4.30663	0
hsa-miR-16	3654.89	222.982	322.167	3977.32	15959.5	293.007	110.193	2368.47	346.921	4071.64	941.862
hsa-miR-451	27.8699	1018.05	349.477	2056.74	529.099	2951.9	367.354	115.997	314.741	1155.52	266.031
hsa-miR-887	7.57333	6.54764	2.19245	43.9731	18.6193	5.10963	1.36732	8.22672	0	14.0026	3.19802
hsa-miR-185star	4.544	3.38671	3.06943	196.563	5.43064	3.28476	7.74817	16.4534	0	36.0464	8.0672
hsa-miR-450b-5p	7.57333	1.1289	0.43849	25.5941	15.1282	4.74465	2.73465	3.29069	0	9.10128	2.00845
hsa-miR-18a	8.48213	1.35468	0.876981	115.685	10.0855	5.83957	2.27887	9.87207	3.36365	23.7207	5.17153
hsa-let-7f-2star	4.544	1.58047	4.3849	16.3802	20.5588	5.10963	0.911549	4.11336	0.480521	8.75968	1.83514
hsa-miR-2355-3p	1.21173	0.903123	3.50792	23.5466	6.59435	1.45989	0.455775	2.46802	0.961042	6.20393	1.29494
hsa-miR-100star	6.05867	0	0.876981	3.07129	1.55161	1.09492	0	0.822672	0.480521	2.10891	0.434398
hsa-miR-199a-3p	15.1467	12.6437	10.0853	842.557	62.2584	7.48195	21.8772	69.1045	4.80521	158.362	31.929
hsa-miR-199b-3p	15.1467	12.6437	10.0853	842.557	62.2584	7.48195	21.8772	69.1045	4.80521	158.362	31.929
hsa-miR-144star	3.93813	10.3859	3.50792	71.6635	27.929	21.8984	5.4693	8.22672	0	23.2205	4.56534
hsa-miR-92b	17135.1	11881.9	10902.5	4948.45	24361.2	20223.6	1955.58	5173.23	1538.51	14908.8	2889.1
hsa-miR-493	2.12053	0.451562	0.43849	42.9981	1.16371	2.55481	1.36732	2.46802	0.961042	8.28786	1.59879
hsa-miR-550astar	4.48314	0.490828	3.94641	21.499	0.775805	0.364973	0	0	0	5.26003	0
hsa-miR-23a	48.1272	5030.55	6610.52	1123.11	1096.96	12397.5	2281.5	161.245	54.501	4384.46	832.416
hsa-miR-100	3084.91	500.462	1521.58	6485.39	12394.8	942.196	413.518	1674.05	244.586	4154.88	777.383
hsa-miR-210	20.5995	1.80625	228.892	360.365	32.9717	14.5989	3.6462	51.8283	5.76625	109.872	20.4136
hsa-miR-3074-3p	0	0.451562	1.31547	1.02376	1.93951	0.364973	0.455775	0	0	0.849214	0.151925
hsa-miR-183	66.9483	3.61249	5.26188	71.6635	28.3169	18.2487	1.36732	14.8081	0.961042	32.3419	5.71216
hsa-miR-320a	5439.57	7373.78	9937.92	38382.3	13236.1	5886.86	2093.72	4765.19	202.766	13376.1	2353.89
hsa-miR-500a	19.968	12.7857	17.3666	139.406	46.2603	18.0972	4.55775	17.0857	0.480521	42.3139	7.37466
hsa-miR-501-3p	10.2997	10.011	36.7486	106.156	27.0106	21.7456	4.10197	13.1628	0.961042	35.3286	6.07526
hsa-miR-106b	69.0688	314.893	1340.34	340.913	94.8181	1022.15	138.555	49.3603	83.1031	530.364	90.3396
hsa-miR-454star	0.302933	0.677342	10.0853	6.14258	4.26693	4.01471	0.455775	1.64534	0	4.2483	0.700373
hsa-miR-204	5.75573	71.3467	77.1743	23.5466	25.9895	176.647	16.4079	12.3401	2.40261	63.41	10.3835
hsa-miR-590-3p	0.302933	10.1601	18.8551	1.02376	0	8.75936	3.19042	0	0	6.51688	1.06347
hsa-miR-193a-5p	32.4139	50.5749	56.5653	995.098	46.5483	143.434	50.1352	55.119	2.40261	220.773	35.8856
hsa-miR-27a	2194.07	8477.93	14506.4	10324.3	32829.5	12277.7	3317.3	2936.75	218.846	13435	2157.63
hsa-miR-502-3p	1.8432	0.716002	3.92105	47.3364	6.07993	4.58486	0	5.14504	0	10.7469	1.71501
hsa-miR-93	1027.85	464.431	2099.93	3291.4	1942.23	1908.07	156.786	397.351	286.391	1788.98	280.176
hsa-miR-532-5p	63.9189	44.7046	146.456	876.342	176.496	125.916	36.462	72.3952	2.88313	238.972	37.2467
hsa-miR-296-3p	1.51467	4.06405	6.57735	20.4753	5.04274	6.20454	0.911549	2.46802	0	7.3131	1.12652
hsa-miR-486-5p	338.64	200.252	94.2754	4145.15	949.967	877.757	60.1444	390.499	44.6885	1101.01	165.111
hsa-miR-500astar	3.02933	3.58098	5.98328	38.8016	13.3578	7.0335	0.455775	4.91742	0	11.9644	1.79107
hsa-miR-362-5p	17.2672	1.1289	13.1547	170.969	28.3169	7.66444	1.36732	13.9854	2.40261	39.7501	5.91845
hsa-miR-146b-3p	0.605867	0.225781	1.75396	27.6416	1.93951	2.55481	0.455775	1.64534	0.480521	5.78693	0.860547
hsa-miR-501-5p	5.4528	1.35468	2.63094	57.3308	22.8863	7.66444	0.455775	6.58138	0	16.22	2.34572
hsa-miR-186star	1.21173	0	0	20.4753	1.16371	0	0	1.64534	0	3.80845	0.548448
hsa-miR-339-5p	18.176	27.0937	12.7162	168.921	35.687	22.6283	6.83662	13.1628	0	47.537	6.66646
hsa-let-7istar	4.24107	9.25701	21.9245	57.3308	17.0677	9.4893	4.10197	4.11336	0	19.8851	2.73844
hsa-miR-1260	26.2762	46.9406	6.43119	202.68	9.97717	3.42162	16.7725	2.05668	1.44156	49.2878	6.75692
hsa-miR-361-3p	123.597	6.54764	52.1803	1167.09	736.627	64.9652	22.333	123.401	1.44156	358.501	49.0584
hsa-miR-455-5p	2.42347	2.25781	6.57735	99.3051	32.1959	16.4238	5.01352	4.11336	1.44156	26.5306	3.52281
hsa-miR-574-5p	3.93813	0.451562	10.0853	210.887	45.3846	9.12433	1.36732	6.58138	10.5715	46.6451	6.17339
hsa-miR-28-3p	284.474	216.225	547.236	1989.17	1047.84	5223.78	129.165	408.947	69.6756	1551.45	202.596
hsa-miR-34a	6.66453	15.3531	38.5871	72.6872	29.0927	26.643	3.6462	0.822672	7.68834	31.5046	4.0524
hsa-miR-135astar	3.02933	4.51562	5.26188	1.02376	0	0.364973	0.911549	0	0	2.36593	0.30385
hsa-miR-223	0	12.1922	12.7162	89.0674	3.49112	24.4532	5.4693	1.64534	1.92208	23.6534	3.01224
hsa-miR-99a	8279.54	1451.29	1197.28	8294.04	42612.3	3298.95	983.434	2701.29	442.378	10855.6	1375.7
hsa-miR-148astar	1.51467	2.48359	2.19245	19.4515	6.98225	7.29946	0	2.46802	0	6.65399	0.822672
hsa-miR-130bstar	30.2933	3.16093	17.9781	61.4258	33.3596	36.1323	2.73465	7.40405	0.480521	30.3917	3.53974
hsa-miR-320c	2.52265	6.22747	14.589	4.71807	1.19037	4.9482	1.46483	0	0.494551	5.69929	0.653125
hsa-miR-92bstar	0.605867	2.03203	6.57735	1.02376	1.93951	2.91979	0	0.822672	0	2.51639	0.274224
hsa-miR-29astar	45.8195	2.28262	1.31547	1682.05	66.1422	1.10751	2.27887	93.8797	0	299.786	32.0528
hsa-miR-146a	17.3334	44.5683	16.6626	2624.62	103.662	69.9732	29.0088	102.265	17.077	479.469	49.4503
hsa-miR-320b	17.5622	68.3198	91.3547	79.7344	39.0703	50.8568	8.98292	8.18215	0	57.8163	5.72169
hsa-miR-25	6488.18	2466.81	5344.17	16871.6	12571.6	6164.3	460.54	1527.41	397.431	8317.79	795.127
hsa-miR-891a	11.5115	3.61249	57.0037	12.2852	25.9895	24.4532	1.36732	1.64534	3.36365	22.4759	2.12544
hsa-miR-3613-5p	1.21173	0	0	27.6416	5.81854	0.364973	0	1.64534	0	5.83948	0.548448
hsa-miR-143star	0	0.677342	0	163.807	10.4734	1.09492	0	3.29093	4.80521	29.3422	2.69871
hsa-miR-155	50.8928	85.7967	972.572	1371.84	158.652	523.007	40.5639	98.7207	3.84417	527.127	47.7096
hsa-miR-146b-5p	62.0352	67.8705	156.103	6785.82	315.273	317.993	105.445	210.35	14.6374	1284.18	110.144
hsa-miR-629star	0.302933	3.83827	3.06943	1.02376	0.387903	2.18984	0.455775	0	0	1.80202	0.151925
hsa-miR-450a	47.2576	0.451562	0.43849	475.026	135.378	1.45989	0.911549	23.8575	0	110.002	8.25635
hsa-miR-142-5p	0.9088	0.903123	0.43849	17.404	1.16371	1.45989	0	0.822672	0	3.713	0.274224
hsa-miR-182	535.586	61.4124	21.486	125.923	44.9967	44.1618	15.0406	13.9854	0.961042	138.928	9.99568
hsa-miR-320d	3.13842	28.8547	58.0773	32.8213	6.55235	15.1581	2.87937	2.23854	0	24.1004	1.70597
hsa-miR-576-3p	3.6352	0.451562	5.70037	53.2357	4.65483	2.18984	0	2.46802	0	11.6446	0.822672
hsa-miR-497star	1.21173	4.06405	1.31547	1.02376	1.16371	4.37968	0.455775	0	0	2.19307	0.151925
hsa-miR-4448	19.9936	9.93435	29.3789	31.7367	2.32742	6.56952	0	3.29069	0	16.6567	1.0969
hsa-miR-4632	1.21173	0.451562	0	13.3089	1.55161	0.729946	0.455775	0	0	2.87563	0.151925
hsa-miR-199a-5p	2.12053	2.48359	1.75396	518.613	8.53386	1.82487	4.55775	5.75871	2.88313	89.2216	4.39986
hsa-miR-362-3p	0	0.903123	12.2777	1.02376	1.55161	2.91979	0.455775	0	0	3.11267	0.151925
hsa-miR-10astar	0	0	0.876981	15.3565	14.7403	13.139	0	0.822672	0	7.35213	0.274224
hsa-miR-199b-5p	3.33227	0.677342	3.06943	383.323	17.8435	1.82487	2.27887	4.93603	0	68.345	2.40497
hsa-miR-891b	0.605867	0.451562	9.64679	0	1.55161	18.2487	0.455775	0	0	5.08408	0.151925
hsa-miR-720	15.4496	2.93515	0	1681.02	10.0855	1.45989	5.92507	16.4534	0.961042	285.158	7.77985
hsa-miR-452	8.48213	0.451562	0	7.16635	133.051	0	0.911549	0.822672	0	24.8584	0.578074
hsa-miR-224	3.02933	0	0.43849	1.02376	290.539	0	0	2.46802	0	49.1718	0.822672
hsa-miR-217	332.621	13.7726	4.82339	35.8317	5.43064	20.8035	0.911549	2.46802	0	68.8804	1.12652
hsa-miR-10bstar	75.7333	6.77342	16.2241	23.5466	26.3774	12.7741	0.455775	0.822672	0	26.9048	0.426149
hsa-miR-1299	13.0261	2.70937	0.43849	163.802	3.87903	32.4826	0	1.64534	0	36.0563	0.548448
hsa-miR-21	8282.8	2639.38	335957	490965	61312.3	169584	2056.45	3307.14	1948.99	178123	2437.53
hsa-miR-21star	7.57333	2.48359	213.106	196.563	15.904	67.52	0.911549	0.822672	0	83.8583	0.578074
hsa-miR-196a	13.9349	5.8703	1449.82	0	46.9362	2.18984	0	0	0	253.126	0
hsa-miR-10a	1.51924	5.65802	7.48328	149.493	269.674	1191.67	1.36732	1.64615	0	270.916	1.00449
hsa-miR-196b	30.5963	0.903123	136.196	13.3089	17.8435	83.2139	0	0	0.480521	47.0102	0.160174
hsa-miR-10b	401.382	183.607	445.916	144.351	424.689	1157.86	0.911549	3.29069	0	459.634	1.40075
hsa-miR-224star	12.1173	0	0	26.6179	1146.64	0	0	1.64534	0	197.563	0.548448
note: miRNAs are ranked by mean fold change based on RPKM scores.
