# Supplementary material for: Reduced Expression of Brain-Enriched microRNAs in Glioblastomas Permits Targeted Regulation of a Cell Death Gene
Source: PLoS One. 2011 Sep 2;6(9):e24248. doi: 10.1371/journal.pone.0024248 (PMC3166303; doi:10.1371/journal.pone.0024248)
Supplement: Table S5 — p-values and False Discovery Rate (FDR)-adjusted p values for all miRNAs detected in glioblastomas and non-tumor brain tissues. (XLSX) [file pone.0024248.s014.xlsx]

## Sheet: TableS5
Table S5: p-values and False Discovery Rate (FDR)-adjusted p values for All miRNAs Detected in Glioblastomas and Non-tumor Brain Tissues
miRNA	p-value	FDR-adjusted p-value
hsa-miR-124	4.14598e-05	0.0186155
hsa-miR-10bstar	8.48803e-05	0.0190556
hsa-miR-139-5p	0.000238593	0.0250522
hsa-miR-7	0.000265049	0.0250522
hsa-miR-10b	0.000309956	0.0250522
hsa-miR-132	0.000334986	0.0250522
hsa-miR-95	0.000390569	0.0250522
hsa-miR-543	0.000711733	0.039946
hsa-let-7d	0.000901831	0.0449913
hsa-miR-323-3p	0.0013114	0.0588816
hsa-miR-128	0.0015092	0.0616026
hsa-miR-139-3p	0.00209813	0.0750728
hsa-miR-598	0.00224773	0.0750728
hsa-miR-103a	0.0023408	0.0750728
hsa-miR-103b	0.0023408	0.0750728
hsa-miR-873	0.00281324	0.078064
hsa-miR-891a	0.00296168	0.078064
hsa-miR-487b	0.00312952	0.078064
hsa-miR-323b-3p	0.00350487	0.0828255
hsa-miR-138-1star	0.00400767	0.0899722
hsa-miR-93	0.00435814	0.0931812
hsa-miR-21star	0.00504524	0.101099
hsa-miR-196b	0.00517881	0.101099
hsa-miR-301b	0.00562252	0.10495
hsa-miR-320d	0.00584351	0.10495
hsa-miR-217	0.00617649	0.106297
hsa-miR-107	0.00639204	0.106297
hsa-miR-411star	0.00883834	0.141729
hsa-miR-124star	0.00930973	0.14414
hsa-miR-25	0.0111198	0.160637
hsa-miR-4448	0.0112694	0.160637
hsa-miR-660	0.0114485	0.160637
hsa-miR-342-3p	0.012017	0.163505
hsa-miR-379star	0.0129677	0.166543
hsa-miR-21	0.0129822	0.166543
hsa-miR-212	0.0134927	0.168284
hsa-miR-320c	0.0152825	0.185455
hsa-miR-153	0.0177511	0.205793
hsa-let-7g	0.0178751	0.205793
hsa-miR-181d	0.0185016	0.20768
hsa-miR-138	0.0210236	0.21945
hsa-miR-885-5p	0.0218039	0.21945
hsa-miR-92b	0.0221878	0.21945
hsa-miR-296-3p	0.0223184	0.21945
hsa-miR-889	0.0224085	0.21945
hsa-miR-379	0.0229586	0.21945
hsa-miR-22	0.0229713	0.21945
hsa-miR-10a	0.0247872	0.231864
hsa-miR-92a	0.0263105	0.24109
hsa-let-7e	0.0290167	0.26057
hsa-miR-218	0.029831	0.262629
hsa-miR-221	0.0309476	0.26722
hsa-miR-136	0.032301	0.273645
hsa-miR-1270	0.0366913	0.294517
hsa-miR-495	0.037214	0.294517
hsa-miR-4787-3p	0.0375744	0.294517
hsa-miR-382	0.038087	0.294517
hsa-miR-126	0.0387958	0.294517
hsa-miR-24	0.0391873	0.294517
hsa-miR-548i	0.0399747	0.294517
hsa-let-7istar	0.0400123	0.294517
hsa-miR-2392	0.0461728	0.318848
hsa-miR-1273d	0.0465666	0.318848
hsa-miR-504	0.0465939	0.318848
hsa-miR-148astar	0.046908	0.318848
hsa-miR-770-5p	0.0472182	0.318848
hsa-miR-767-5p	0.0475786	0.318848
hsa-miR-490-3p	0.0500192	0.330274
hsa-miR-196a	0.0512672	0.333609
hsa-miR-127-3p	0.0520105	0.33361
hsa-miR-106b	0.053321	0.337199
hsa-miR-100star	0.0575973	0.350437
hsa-miR-935	0.058434	0.350437
hsa-miR-34a	0.0590981	0.350437
hsa-miR-28-3p	0.0592075	0.350437
hsa-miR-320b	0.0599813	0.350437
hsa-miR-129-3p	0.0600973	0.350437
hsa-miR-330-3p	0.0615366	0.35423
hsa-miR-129star	0.0639241	0.363315
hsa-miR-136star	0.0655165	0.365182
hsa-miR-497star	0.0664057	0.365182
hsa-miR-485-3p	0.0666925	0.365182
hsa-miR-1299	0.0697376	0.377255
hsa-miR-432	0.0707071	0.377946
hsa-miR-10astar	0.072557	0.383272
hsa-miR-149	0.074027	0.38606
hsa-miR-410	0.075114	0.38606
hsa-miR-130bstar	0.0756644	0.38606
hsa-miR-381	0.0775631	0.391301
hsa-miR-99a	0.0838162	0.410949
hsa-miR-182	0.0848356	0.410949
hsa-miR-329	0.0850307	0.410949
hsa-miR-1	0.0851186	0.410949
hsa-miR-26bstar	0.0875151	0.418024
hsa-miR-19b	0.0893764	0.422421
hsa-miR-92bstar	0.0912816	0.426932
hsa-miR-491-5p	0.0922629	0.427073
hsa-miR-1286	0.0947586	0.430951
hsa-miR-33a	0.0950204	0.430951
hsa-miR-204	0.0971336	0.432354
hsa-miR-375	0.0975367	0.432354
hsa-miR-137	0.0985266	0.432354
hsa-miR-362-3p	0.101162	0.432354
hsa-miR-500astar	0.10293	0.432354
hsa-miR-490-5p	0.103549	0.432354
hsa-let-7f-2star	0.103682	0.432354
hsa-miR-223	0.103954	0.432354
hsa-miR-30b	0.104607	0.432354
hsa-miR-148a	0.104959	0.432354
hsa-miR-744	0.107346	0.433053
hsa-miR-129-5p	0.107457	0.433053
hsa-miR-155	0.108336	0.433053
hsa-miR-501-3p	0.110213	0.433053
hsa-miR-1224-5p	0.110258	0.433053
hsa-miR-339-5p	0.111387	0.433053
hsa-miR-376a	0.112205	0.433053
hsa-miR-100	0.112845	0.433053
hsa-miR-30e	0.119293	0.451701
hsa-miR-455-5p	0.120657	0.451701
hsa-miR-486-5p	0.120886	0.451701
hsa-miR-383	0.121728	0.451701
hsa-miR-30c	0.124662	0.456679
hsa-miR-628-5p	0.125104	0.456679
hsa-miR-541	0.127216	0.457575
hsa-miR-708	0.127737	0.457575
hsa-miR-376c	0.128406	0.457575
hsa-miR-27a	0.129695	0.458527
hsa-miR-132star	0.132155	0.46065
hsa-miR-183	0.132347	0.46065
hsa-miR-370	0.143359	0.481265
hsa-miR-346	0.14351	0.481265
hsa-miR-19a	0.143944	0.481265
hsa-miR-127-5p	0.1455	0.481265
hsa-miR-98	0.146102	0.481265
hsa-miR-224star	0.146438	0.481265
hsa-miR-320a	0.146837	0.481265
hsa-miR-452	0.146845	0.481265
hsa-miR-2681	0.149373	0.486003
hsa-miR-1260	0.153863	0.48983
hsa-miR-134	0.154911	0.48983
hsa-miR-576-3p	0.155341	0.48983
hsa-miR-29b	0.155727	0.48983
hsa-miR-143	0.159097	0.48983
hsa-miR-501-5p	0.160033	0.48983
hsa-miR-30a	0.160071	0.48983
hsa-miR-323b-5p	0.160188	0.48983
hsa-miR-887	0.160636	0.48983
hsa-miR-20b	0.162671	0.48983
hsa-miR-625	0.164938	0.48983
hsa-miR-4510	0.165876	0.48983
hsa-miR-144star	0.16612	0.48983
hsa-miR-500a	0.166418	0.48983
hsa-miR-532-5p	0.168752	0.48983
hsa-miR-2355-3p	0.169071	0.48983
hsa-miR-615-3p	0.169095	0.48983
hsa-miR-409-3p	0.170257	0.490034
hsa-miR-769-5p	0.176507	0.504789
hsa-miR-200c	0.179951	0.511381
hsa-miR-431star	0.181691	0.511757
hsa-miR-17	0.183502	0.511757
hsa-miR-454star	0.183939	0.511757
hsa-miR-2682	0.18566	0.511757
hsa-let-7astar	0.186793	0.511757
hsa-miR-592	0.186922	0.511757
hsa-miR-34c-5p	0.192076	0.517147
hsa-miR-891b	0.192246	0.517147
hsa-miR-424	0.192643	0.517147
hsa-miR-411	0.196414	0.517147
hsa-let-7bstar	0.197075	0.517147
hsa-miR-376b	0.1989	0.517147
hsa-miR-105	0.199236	0.517147
hsa-miR-485-5p	0.199451	0.517147
hsa-miR-30d	0.199646	0.517147
hsa-miR-668	0.202263	0.517147
hsa-miR-362-5p	0.20263	0.517147
hsa-miR-496	0.202712	0.517147
hsa-miR-193a-3p	0.205805	0.522071
hsa-miR-654-3p	0.208867	0.52686
hsa-miR-20a	0.21018	0.527212
hsa-miR-200b	0.214103	0.531983
hsa-miR-299-3p	0.214518	0.531983
hsa-miR-3177-3p	0.216887	0.531983
hsa-miR-338-5p	0.217905	0.531983
hsa-miR-433	0.219045	0.531983
hsa-miR-106bstar	0.219191	0.531983
hsa-miR-374astar	0.223538	0.539617
hsa-miR-431	0.229363	0.550716
hsa-miR-758	0.231245	0.550909
hsa-miR-550a	0.231897	0.550909
hsa-miR-135astar	0.233207	0.551106
hsa-miR-154star	0.234617	0.551533
hsa-miR-146b-5p	0.246716	0.56959
hsa-miR-5096	0.246942	0.56959
hsa-miR-378d	0.247994	0.56959
hsa-miR-539	0.24841	0.56959
hsa-miR-23a	0.249497	0.56959
hsa-miR-3065-5p	0.250681	0.56959
hsa-miR-1296	0.251618	0.56959
hsa-miR-138-2star	0.252446	0.56959
hsa-miR-874	0.254125	0.570511
hsa-miR-193a-5p	0.259357	0.579359
hsa-let-7a-2star	0.262723	0.583972
hsa-miR-339-3p	0.266289	0.587243
hsa-miR-361-3p	0.26784	0.587243
hsa-miR-654-5p	0.268118	0.587243
hsa-miR-589	0.273963	0.594813
hsa-miR-552	0.274223	0.594813
hsa-miR-505	0.275572	0.594864
hsa-miR-146b-3p	0.276957	0.594993
hsa-miR-502-3p	0.286695	0.611543
hsa-miR-181c	0.287385	0.611543
hsa-miR-330-5p	0.297348	0.625588
hsa-miR-491-3p	0.297791	0.625588
hsa-miR-193b	0.298652	0.625588
hsa-miR-4632	0.299558	0.625588
hsa-miR-451	0.302374	0.625751
hsa-miR-187	0.306978	0.625751
hsa-miR-454	0.307571	0.625751
hsa-miR-3065-3p	0.307665	0.625751
hsa-miR-195	0.309454	0.625751
hsa-miR-532-3p	0.310136	0.625751
hsa-miR-130a	0.311883	0.625751
hsa-miR-548b-3p	0.311904	0.625751
hsa-miR-425star	0.312178	0.625751
hsa-miR-487a	0.32186	0.642043
hsa-miR-199b-5p	0.326625	0.642043
hsa-miR-30c-1star	0.326849	0.642043
hsa-miR-551bstar	0.327176	0.642043
hsa-miR-3615	0.330023	0.642043
hsa-miR-184	0.331516	0.642043
hsa-miR-1912	0.331714	0.642043
hsa-miR-2113	0.334681	0.642043
hsa-miR-1271	0.338171	0.642043
hsa-miR-1261	0.338802	0.642043
hsa-miR-1292	0.338964	0.642043
hsa-miR-210	0.340377	0.642043
hsa-miR-497	0.342767	0.642043
hsa-miR-28-5p	0.343129	0.642043
hsa-let-7a	0.343652	0.642043
hsa-miR-422a	0.343886	0.642043
hsa-miR-27bstar	0.3458	0.642043
hsa-miR-450b-5p	0.34733	0.642043
hsa-miR-188-5p	0.347475	0.642043
hsa-miR-1343	0.350718	0.643937
hsa-miR-32	0.351737	0.643937
hsa-miR-550astar	0.352803	0.643937
hsa-miR-3647-3p	0.360981	0.652655
hsa-miR-378	0.361932	0.652655
hsa-miR-4742-3p	0.36194	0.652655
hsa-miR-1285	0.367502	0.660033
hsa-miR-296-5p	0.369426	0.660846
hsa-miR-548c-5p	0.371271	0.66151
hsa-miR-335	0.374732	0.664214
hsa-miR-154	0.375747	0.664214
hsa-miR-1249	0.378415	0.665601
hsa-miR-181b	0.379496	0.665601
hsa-miR-766	0.383885	0.670678
hsa-miR-185	0.387159	0.673776
hsa-miR-618	0.388752	0.673937
hsa-miR-125a-3p	0.392733	0.675858
hsa-miR-142-3p	0.393094	0.675858
hsa-miR-885-3p	0.394376	0.675858
hsa-miR-3192	0.398072	0.678007
hsa-miR-369-3p	0.400216	0.678007
hsa-miR-16	0.400787	0.678007
hsa-miR-3943	0.40167	0.678007
hsa-miR-1247	0.403241	0.678109
hsa-miR-376astar	0.406577	0.680301
hsa-miR-629star	0.407575	0.680301
hsa-miR-19b-1star	0.409313	0.680672
hsa-miR-3928	0.413952	0.685847
hsa-miR-191	0.416742	0.687223
hsa-miR-142-5p	0.419387	0.687223
hsa-miR-3135b	0.420176	0.687223
hsa-miR-99astar	0.420905	0.687223
hsa-miR-181a-2star	0.424444	0.690491
hsa-miR-590-3p	0.426692	0.691642
hsa-miR-671-5p	0.431834	0.694027
hsa-miR-326	0.433715	0.694027
hsa-miR-380	0.434124	0.694027
hsa-miR-222	0.434347	0.694027
hsa-miR-374a	0.438636	0.694039
hsa-miR-146a	0.440355	0.694039
hsa-miR-219-2-3p	0.440521	0.694039
hsa-miR-3613-5p	0.440988	0.694039
hsa-miR-574-5p	0.443371	0.694039
hsa-miR-664	0.443629	0.694039
hsa-miR-425	0.447077	0.697006
hsa-miR-26b	0.45222	0.701904
hsa-miR-941	0.453346	0.701904
hsa-miR-760	0.459598	0.70914
hsa-miR-769-3p	0.463174	0.709875
hsa-miR-1287	0.463504	0.709875
hsa-miR-509-3p	0.464818	0.709875
hsa-miR-340	0.466444	0.709944
hsa-miR-3200-3p	0.47176	0.711404
hsa-miR-345	0.473859	0.711404
hsa-miR-450a	0.47424	0.711404
hsa-let-7dstar	0.475349	0.711404
hsa-miR-378c	0.475877	0.711404
hsa-miR-186star	0.47691	0.711404
hsa-miR-29b-2star	0.480112	0.71381
hsa-miR-2114	0.482867	0.714781
hsa-miR-2276	0.485218	0.714781
hsa-miR-455-3p	0.485542	0.714781
hsa-miR-30dstar	0.489067	0.717618
hsa-miR-99bstar	0.493296	0.721465
hsa-miR-423-5p	0.497073	0.724629
hsa-miR-340star	0.499331	0.725565
hsa-miR-150	0.507981	0.993847
hsa-miR-374b	0.512168	0.739433
hsa-let-7f	0.514886	0.740974
hsa-miR-224	0.518929	0.741063
hsa-miR-193bstar	0.519857	0.741063
hsa-miR-574-3p	0.519899	0.741063
hsa-miR-214	0.52883	0.74465
hsa-miR-219-5p	0.530442	0.74465
hsa-miR-125b	0.531386	0.74465
hsa-miR-328	0.531438	0.74465
hsa-miR-125a-5p	0.531947	0.74465
hsa-miR-7-1star	0.532367	0.74465
hsa-miR-92a-1star	0.535923	0.747296
hsa-miR-374bstar	0.540161	0.74948
hsa-miR-331-3p	0.540827	0.74948
hsa-miR-4446-3p	0.553749	0.765026
hsa-miR-1269	0.566435	0.780151
hsa-miR-130b	0.5682	0.780189
hsa-miR-194	0.572994	0.784373
hsa-miR-720	0.578516	0.788643
hsa-miR-624star	0.58114	0.788643
hsa-miR-203	0.584964	0.788643
hsa-miR-135b	0.586199	0.788643
hsa-miR-186	0.586579	0.788643
hsa-miR-378star	0.589493	0.788643
hsa-miR-140-3p	0.589755	0.788643
hsa-miR-181a	0.590165	0.788643
hsa-miR-301a	0.601924	0.799804
hsa-miR-324-3p	0.60208	0.799804
hsa-miR-191star	0.608717	0.806236
hsa-miR-29astar	0.613811	0.810591
hsa-miR-30c-2star	0.624785	0.822664
hsa-miR-125b-2star	0.627704	0.824091
hsa-miR-145star	0.633976	0.827899
hsa-miR-18a	0.634292	0.827899
hsa-miR-3074-5p	0.639462	0.832228
hsa-miR-1179	0.641635	0.832642
hsa-miR-144	0.654337	0.846678
hsa-miR-1226	0.657049	0.847744
hsa-miR-221star	0.660247	0.848766
hsa-miR-199a-5p	0.663486	0.848766
hsa-miR-937	0.663512	0.848766
hsa-miR-365	0.67053	0.852474
hsa-miR-542-3p	0.674144	0.852474
hsa-miR-1301	0.67415	0.852474
hsa-miR-3184	0.67591	0.852474
hsa-miR-484	0.676766	0.852474
hsa-miR-655	0.677802	0.852474
hsa-miR-363	0.681888	0.854566
hsa-miR-493star	0.685433	0.854566
hsa-miR-1298	0.688365	0.854566
hsa-miR-199a-3p	0.691948	0.854566
hsa-miR-199b-3p	0.691948	0.854566
hsa-miR-377	0.694736	0.854566
hsa-miR-181cstar	0.698601	0.854566
hsa-miR-369-5p	0.699768	0.854566
hsa-miR-192	0.700704	0.854566
hsa-miR-4482	0.701263	0.854566
hsa-miR-744star	0.701916	0.854566
hsa-miR-27b	0.702304	0.854566
hsa-miR-324-5p	0.706088	0.856847
hsa-miR-2964a-5p	0.71333	0.863302
hsa-let-7gstar	0.721731	0.868147
hsa-miR-23c	0.724918	0.868147
hsa-miR-377star	0.726159	0.868147
hsa-miR-493	0.726521	0.868147
hsa-miR-22star	0.727001	0.868147
hsa-miR-185star	0.732987	0.872475
hsa-miR-140-5p	0.736228	0.872475
hsa-miR-30bstar	0.737839	0.872475
hsa-miR-200a	0.738398	0.872475
hsa-miR-99b	0.748553	0.880694
hsa-miR-9star	0.752632	0.880694
hsa-miR-3074-3p	0.75433	0.880694
hsa-miR-135a	0.754575	0.880694
hsa-miR-15a	0.755161	0.880694
hsa-miR-29cstar	0.758111	0.88155
hsa-miR-197	0.759821	0.88155
hsa-miR-101	0.766134	0.885291
hsa-miR-582-5p	0.766989	0.885291
hsa-miR-190	0.773361	0.890357
hsa-miR-676	0.781562	0.893279
hsa-let-7c	0.783107	0.893279
hsa-miR-125b-1star	0.783285	0.893279
hsa-miR-545star	0.789861	0.893279
hsa-miR-4677-3p	0.791357	0.893279
hsa-miR-625star	0.791975	0.893279
hsa-miR-151-5p	0.793324	0.893279
hsa-miR-143star	0.793792	0.893279
hsa-miR-582-3p	0.793804	0.893279
hsa-miR-106a	0.798501	0.896317
hsa-miR-629	0.800699	0.896543
hsa-miR-30astar	0.807818	0.900588
hsa-miR-1276	0.808322	0.900588
hsa-miR-488	0.81333	0.903924
hsa-miR-29c	0.822161	0.911482
hsa-miR-584	0.827955	0.914459
hsa-miR-671-3p	0.828919	0.914459
hsa-miR-505star	0.841048	0.924319
hsa-miR-628-3p	0.843939	0.924319
hsa-miR-423-3p	0.844033	0.924319
hsa-miR-421	0.848644	0.927107
hsa-miR-708star	0.857025	0.933991
hsa-miR-361-5p	0.860923	0.934314
hsa-miR-181astar	0.861483	0.934314
hsa-miR-34c-3p	0.864076	0.934868
hsa-miR-1307	0.876967	0.946534
hsa-miR-513c	0.884618	0.952502
hsa-miR-652	0.892034	0.958189
hsa-miR-877	0.899565	0.961988
hsa-miR-3960	0.901934	0.961988
hsa-let-7b	0.901997	0.961988
hsa-miR-335star	0.912856	0.971261
hsa-miR-126star	0.915671	0.971953
hsa-miR-9	0.920202	0.974459
hsa-miR-33b	0.927115	0.978967
hsa-miR-34b	0.929573	0.978967
hsa-miR-151-3p	0.935045	0.978967
hsa-miR-664star	0.93519	0.978967
hsa-miR-1180	0.935361	0.978967
hsa-miR-1251	0.938428	0.979264
hsa-miR-29b-1star	0.940006	0.979264
hsa-miR-152	0.949202	0.981942
hsa-let-7i	0.949527	0.981942
hsa-miR-331-5p	0.951169	0.981942
hsa-miR-1468	0.952202	0.981942
hsa-miR-29a	0.953511	0.981942
hsa-miR-888	0.956549	0.982816
hsa-miR-23b	0.96026	0.984376
hsa-miR-4443	0.964573	0.986546
hsa-miR-26a	0.972494	0.988256
hsa-miR-2964a-3p	0.972848	0.988256
hsa-miR-15b	0.972849	0.988256
hsa-miR-503	0.977867	0.990392
hsa-miR-1260b	0.979363	0.990392
hsa-miR-30estar	0.982007	0.990834
hsa-miR-3605-3p	0.99012	0.993628
hsa-miR-148b	0.991556	0.993628
hsa-miR-211	0.99337	0.993628
hsa-miR-145	0.993628	0.993628
