# Supplementary material for: Reduced Expression of Brain-Enriched microRNAs in Glioblastomas Permits Targeted Regulation of a Cell Death Gene
Source: PLoS One. 2011 Sep 2;6(9):e24248. doi: 10.1371/journal.pone.0024248 (PMC3166303; doi:10.1371/journal.pone.0024248)
Supplement: Table S6 — Differentially expressed miRNAs in glioblastomas (GBM) vs non-tumor brain (NB). (XLSX) [file pone.0024248.s015.xlsx]

## Sheet: TableS6
Table S6: Differentially Expressed miRNAs in Glioblastomas (GBM) vs Non-tumor Brain (NB)
miRNA	Mean RPKM GBM	Mean RPKM NB	Fold Change (GBM vs NB)	GBM vs NB	p value < 0.05	FDR-adjusted p value	Previously Reported
hsa-miR-10bstar	2690.48	42.6149	63.1348	UP	8.48803e-05	0.0190556
hsa-miR-10b	45963.4	140.075	328.135	UP	0.000309956	0.0250522	Silber et. al., 2008; Godlewski et. al., 2008; Ciafre et. al., 2005
hsa-miR-891a	2247.59	212.544	10.5747	UP	0.00296168	0.078064
hsa-miR-93	178898	28017.6	6.38522	UP	0.00435814	0.0931812
hsa-miR-196b	4701.02	16.0174	293.495	UP	0.00517881	0.101099
hsa-miR-21star	8385.83	57.8074	145.065	UP	0.00504524	0.101099
hsa-miR-320d	2410.04	170.597	14.1271	UP	0.00584351	0.10495
hsa-miR-217	6888.04	112.652	61.1443	UP	0.00617649	0.106297
hsa-miR-4448	1665.67	109.69	15.1853	UP	0.0112694	0.160637
hsa-miR-25	831779	79512.7	10.461	UP	0.0111198	0.160637	Ciafre et. al., 2005
hsa-miR-660	4897.46	1232.66	3.97309	UP	0.0114485	0.160637
hsa-miR-21	1.78123e+07	243753	73.0754	UP	0.0129822	0.166543	Silber et. al., 2008; Godlewski et. al., 2008; Ciafre et. al., 2007
hsa-miR-320c	569.929	65.3125	8.72618	UP	0.0152825	0.185455
hsa-miR-296-3p	731.31	112.652	6.49176	UP	0.0223184	0.21945
hsa-miR-92b	1.49088e+06	288910	5.16035	UP	0.0221878	0.21945
hsa-miR-10a	27091.6	100.449	269.704	UP	0.0247872	0.231864
hsa-miR-92a	832232	195249	4.26242	UP	0.0263105	0.24109
hsa-let-7istar	1988.51	273.844	7.26145	UP	0.0400123	0.294517
hsa-miR-148astar	665.399	82.2672	8.08826	UP	0.046908	0.318848
hsa-miR-124	1977.8	1.56087e+06	0.00126711	DOWN	4.14598e-05	0.0186155	Silber et. al., 2008; Godlewski et. al., 2008; Ferretti et. al., 2009*; Uziel et. al., 2009**
hsa-miR-95	9841.22	56637.9	0.173757	DOWN	0.000390569	0.0250522
hsa-miR-132	67874.6	1.09985e+06	0.0617127	DOWN	0.000334986	0.0250522	Silber et. al., 2008; Ferretti et. al., 2009*
hsa-miR-139-5p	768.483	28186.6	0.0272641	DOWN	0.000238593	0.0250522	Silber et. al, 2008; Godlewski et. al., 2008
hsa-miR-7	2806.47	204582	0.0137181	DOWN	0.000265049	0.0250522	Silber et. al., 2008; Ferretti et. al., 2009*
hsa-miR-543	194.925	4004.75	0.0486735	DOWN	0.000711733	0.039946
hsa-let-7d	27646.7	82067.5	0.336877	DOWN	0.000901831	0.0449913
hsa-miR-323-3p	747.736	14666.6	0.0509824	DOWN	0.0013114	0.0588816	Silber et. al., 2008; Godlewski et.al., 2008; Ferretti et. al., 2009*
hsa-miR-128	7295.61	1.64861e+06	0.00442531	DOWN	0.0015092	0.0616026	Silber et. al., 2008; Godlewski et.al., 2008; Ciafre et. al., 2005; Ferretti et. al., 2009*; Uziel et. al., 2009**
hsa-miR-598	2487.53	7867.44	0.31618	DOWN	0.00224773	0.0750728
hsa-miR-103a	134279	1.98608e+06	0.0676103	DOWN	0.0023408	0.0750728	Ferretti et. al., 2009*
hsa-miR-103b	134279	1.98608e+06	0.0676103	DOWN	0.0023408	0.0750728	Ferretti et. al., 2009*
hsa-miR-139-3p	18.9097	2456.53	0.00769772	DOWN	0.00209813	0.0750728
hsa-miR-487b	754.754	13700.6	0.0550891	DOWN	0.00312952	0.078064	Uziel et. al., 2009**
hsa-miR-873	372.117	60963.1	0.00610397	DOWN	0.00281324	0.078064
hsa-miR-323b-3p	275.017	2851.99	0.09643	DOWN	0.00350487	0.0828255	Silber et. al., 2008; Godlewski et.al., 2008; Ferretti et. al., 2009*
hsa-miR-138-1star	380.995	2783.88	0.136858	DOWN	0.00400767	0.0899722
hsa-miR-301b	66.3994	366.161	0.181339	DOWN	0.00562252	0.10495
hsa-miR-107	1537.55	54230.3	0.0283522	DOWN	0.00639204	0.106297	Silber et. al., 2008; Ferretti et. al., 2009*
hsa-miR-411-3p	752.227	4851.86	0.155039	DOWN	0.00883834	0.141729
hsa-miR-124star	385.21	5853.62	0.0658071	DOWN	0.00930973	0.14414
hsa-miR-342-3p	1348.04	9526.8	0.141499	DOWN	0.012017	0.163505
hsa-miR-379star	704.069	2323.26	0.303051	DOWN	0.0129677	0.166543
hsa-miR-212	517.123	6223.06	0.0830978	DOWN	0.0134927	0.168284	Ferretti et. al., 2009*
hsa-let-7g	50820.5	84654.6	0.600328	DOWN	0.0178751	0.205793
hsa-miR-153	314.761	1570.16	0.200465	DOWN	0.0177511	0.205793	Silber et. al., 2008; Ferretti et. al., 2009*
hsa-miR-181d	68028.2	151846	0.448009	DOWN	0.0185016	0.20768	Ferretti et. al., 2009*
hsa-miR-22	183928	876104	0.209939	DOWN	0.0229713	0.21945	Ferretti et. al., 2009*
hsa-miR-889	470.797	3417.93	0.137743	DOWN	0.0224085	0.21945
hsa-miR-885-5p	479.963	3856.8	0.124446	DOWN	0.0218039	0.21945
hsa-miR-379	6707.14	61266.7	0.109474	DOWN	0.0229586	0.21945
hsa-miR-138	4200.42	92503.9	0.045408	DOWN	0.0210236	0.21945	Silber et. al., 2008; Ferretti et. al., 2009*; Uziel et. al., 2009**
hsa-let-7e	388312	837809	0.463486	DOWN	0.0290167	0.26057
hsa-miR-218	215.9	44259.3	0.00487808	DOWN	0.029831	0.262629	Silber et. al., 2008; Godlewski et. al., 2008; Uziel et. al., 2009**
hsa-miR-221	253308	857544	0.295388	DOWN	0.0309476	0.26722
hsa-miR-136	564.376	3635.83	0.155226	DOWN	0.032301	0.273645	Uziel et. al., 2009**
hsa-miR-24	78089.3	162956	0.479206	DOWN	0.0391873	0.294517
hsa-miR-4787-3p	42.7467	100.422	0.425669	DOWN	0.0375744	0.294517
hsa-miR-126	4681.61	13287.8	0.352325	DOWN	0.0387958	0.294517
hsa-miR-548i	18.8221	82.1407	0.229145	DOWN	0.0399747	0.294517
hsa-miR-382	7676.41	35616.2	0.215531	DOWN	0.038087	0.294517	Ferretti et. al., 2009*; Uziel et. al., 2009**
hsa-miR-1270	33.5256	477.164	0.0702602	DOWN	0.0366913	0.294517
hsa-miR-495	364.377	6856.24	0.0531452	DOWN	0.037214	0.294517
hsa-miR-2392	3857.18	8543.67	0.451467	DOWN	0.0461728	0.318848
hsa-miR-1273d	33.1522	170.46	0.194487	DOWN	0.0465666	0.318848
hsa-miR-767-5p	218.517	1438.79	0.151875	DOWN	0.0475786	0.318848
hsa-miR-770-5p	270.701	2616.4	0.103463	DOWN	0.0472182	0.318848
hsa-miR-504	540.09	10941.5	0.0493617	DOWN	0.0465939	0.318848
hsa-miR-490-3p	88.4385	1908.25	0.0463453	DOWN	0.0500192	0.330274
highlighted in green are miRNAs significantly down-regulated in glioblastoma (FDR-adjusted p-value < 0.1)
Ferretti et. al., 2009* and Uziel et. al., 2009** indicates miRNA is dysregulated in medulloblastoma compared to normal brain tissue in human samples or a mouse model, respectively.
