# Supplementary material for: Reduced Expression of Brain-Enriched microRNAs in Glioblastomas Permits Targeted Regulation of a Cell Death Gene
Source: PLoS One. 2011 Sep 2;6(9):e24248. doi: 10.1371/journal.pone.0024248 (PMC3166303; doi:10.1371/journal.pone.0024248)
Supplement: Table S8 — 5′-end variations alter miRNA seed sequences. (XLSX) [file pone.0024248.s017.xlsx]

## Sheet: TableS8
Table S8: 5’ end variations alter miRNA seed sequences.
miRNA	Seed (nt 2-8)	N4577	N3034	N3032	G4562	G3522	G3508	G3346	G3183	G3182
hsa-mir-101-1-3p	UACAGUA	0.34	0.36	0.4	0.26	0.27	0.29	0.25	0.4	0.28
hsa-mir-101-1-3p	ACAGUAC	0.65	0.63	0.58	0.73	0.72	0.7	0.74	0.59	0.71
hsa-mir-106b-3p	ACCGCAC	0.1	0.08	0.04	0.26	0.24	0.27	0.35	0.2	0.11
hsa-mir-106b-3p	CGCACUG	0.9	0.85	0.92	0.69	0.71	0.69	0.59	0.75	0.85
hsa-mir-10b-5p	ACCCUGU	0	0.25	0.67	0.9	0.71	0.68	0.93	0.9	0.63
hsa-mir-10b-5p	CCCUGUA	0	0.75	0.33	0.09	0.28	0.31	0.06	0.09	0.36
hsa-mir-124-1-3p	UAAGGCA	0.12	0.94	0.18	0.2	0.98	0.96	0.2	0.16	0.96
hsa-mir-124-1-3p	AAGGCAC	0.87	0.06	0.81	0.8	0.02	0.04	0.7	0.82	0.04
hsa-mir-126-3p	CGUACCG	0.75	0.75	0.8	0.77	0.76	0.71	0.83	0.87	0.78
hsa-mir-126-3p	GUACCGU	0.17	0.22	0.13	0.13	0.23	0.27	0.13	0.09	0.2
hsa-mir-136-3p	AUCAUCG	0.26	0.17	0.16	0.15	0.13	0.11	0	0.31	0.17
hsa-mir-136-3p	UCAUCGU	0.63	0.62	0.66	0.69	0.58	0.59	0	0.56	0.58
hsa-mir-136-3p	CAUCGUC	0.07	0.21	0.17	0.15	0.29	0.3	1	0.13	0.23
hsa-mir-137-3p	UAUUGCU	0.88	0.8	0.76	0.8	0	0.9	0.52	0.52	0.88
hsa-mir-137-3p	AUUGCUU	0.11	0.09	0.14	0.13	0	0.1	0.22	0.29	0.05
hsa-mir-137-3p	UUGCUUA	0.01	0.09	0.09	0.07	0	0	0.25	0.17	0.04
hsa-mir-140-3p	ACCACAG	0.3	0.43	0.42	0.47	0.52	0.52	0.48	0.48	0.46
hsa-mir-140-3p	CCACAGG	0.68	0.53	0.54	0.51	0.45	0.46	0.49	0.49	0.51
hsa-mir-142-3p	GUAGUGU	0.76	0.61	0.39	0.44	0.61	0.57	0.48	0.54	0.61
hsa-mir-142-3p	UAGUGUU	0.2	0.35	0.59	0.53	0.36	0.37	0.48	0.43	0.34
hsa-mir-183-5p	AUGGCAC	0	0.82	1	0.68	0.69	0.67	0.73	0.63	0.69
hsa-mir-183-5p	UGGCACU	0	0.18	0	0.27	0.29	0.26	0.18	0.32	0.27
hsa-mir-30a-3p	UUUCAGU	0.84	0.89	0.88	0.84	0.91	0.89	0.84	0.87	0.89
hsa-mir-30a-3p	UUCAGUC	0.14	0.11	0.11	0.15	0.09	0.1	0.15	0.12	0.1
hsa-mir-320b-1-3p	AAAAGCU	0.01	0.02	0.02	0.01	0.01	0.01	0.02	0.02	0
hsa-mir-320b-1-3p	AAAGCUG	0.93	0.93	0.93	0.91	0.94	0.93	0.92	0.92	0
hsa-mir-320b-1-3p	AAGCUGG	0.06	0.04	0.06	0.07	0.04	0.05	0.05	0.06	0.86
hsa-mir-320b-1-3p	AGCUGGG	0	0.01	0	0	0.01	0.01	0	0	0.1
hsa-mir-323-3p	CACAUUA	0.31	0.42	0.45	0.4	0.33	0.2	0	0.22	0.48
hsa-mir-323-3p	ACAUUAC	0.46	0.56	0.49	0.56	0.64	0.8	1	0.56	0.48
hsa-mir-324-3p	CACUGCC	1	0.3	0.41	0.1	0.17	0.15	0.17	0.2	0.23
hsa-mir-324-3p	CUGCCCC	0	0.67	0.58	0.9	0.74	0.83	0.79	0.8	0.73
hsa-mir-330-3p	CAAAGCA	0.41	0.53	0.52	0.46	0.88	0.6	0.47	0.53	0.5
hsa-mir-330-3p	AAAGCAC	0.21	0.42	0.39	0.46	0	0.4	0.44	0.41	0.45
hsa-mir-331-3p	CCCCUGG	0.67	0.8	0.88	0.7	0.66	0.83	0.69	0.91	0.79
hsa-mir-331-3p	CCCUGGG	0.17	0.17	0.09	0.19	0.29	0.15	0.31	0.07	0.2
hsa-mir-335-3p	UUUUUCA	0.31	0.27	0.25	0.19	0	0.09	0.1	0.12	0.23
hsa-mir-335-3p	UUUUCAU	0.69	0.64	0.71	0.81	1	0.9	0.88	0.86	0.73
hsa-mir-378-3p	CUGGACU	0.91	0.84	0.88	0.91	0.87	0.87	0.91	0.89	0.86
hsa-mir-378-3p	UGGACUU	0.06	0.14	0.1	0.08	0.12	0.12	0.08	0.1	0.12
hsa-mir-409-3p	GAAUGUU	0.16	0.18	0.19	0.33	0.36	0.56	0.5	0.34	0.28
hsa-mir-409-3p	AAUGUUG	0.68	0.75	0.73	0.56	0.58	0.42	0.5	0.58	0.64
hsa-mir-409-3p	AUGUUGC	0.16	0.06	0.08	0.1	0.04	0.01	0	0.07	0.02
hsa-mir-411-5p	UAGUAGA	0.46	0.66	0.53	0.44	0.34	0.38	0.5	0.28	0.54
hsa-mir-411-5p	AGUAGAC	0.54	0.32	0.44	0.56	0.62	0.62	0.5	0.67	0.46
hsa-mir-423-3p	AGCUCGG	0.13	0.16	0.14	0.16	0.18	0.17	0.13	0.14	0.17
hsa-mir-423-3p	GCUCGGU	0.87	0.81	0.83	0.82	0.79	0.8	0.86	0.84	0.82
hsa-mir-431-3p	UGCAGGU	0.47	0.37	0.5	0.38	0.38	0.33	0	0.49	0.35
hsa-mir-431-3p	GCAGGUC	0.13	0.27	0.31	0.48	0.23	0.33	0	0.3	0.27
hsa-mir-431-3p	AGGUCGU	0.33	0.33	0.18	0.14	0.4	0.33	0	0.21	0.37
hsa-mir-452-5p	ACUGUUU	0	0.13	0.33	0	0.23	0.09	0	0.17	0.27
hsa-mir-452-5p	UGUUUGC	0	0	0.07	0.22	0.04	0.02	0	0.09	0.07
hsa-mir-452-5p	GUUUGCA	1	0.88	0.6	0.78	0.71	0.87	1	0.71	0.63
hsa-mir-497-5p	AGCAGCA	0.65	0.57	0.41	0.46	0.78	0.52	0.4	0.47	0.65
hsa-mir-497-5p	GCAGCAC	0.35	0.3	0.41	0.47	0.17	0.4	0.53	0.49	0.31
hsa-mir-501-3p	AUGCACC	0.75	0.5	0.58	0.6	0.48	0.67	0.72	0.73	0.54
hsa-mir-501-3p	UGCACCC	0.25	0.5	0.42	0.4	0.5	0.32	0.28	0.25	0.46
hsa-mir-504-5p	GACCCUG	0.22	0.28	0.31	0	0.5	0.2	0	0.5	0.39
hsa-mir-504-5p	ACCCUGG	0.78	0.7	0.66	0	0.38	0.8	1	0.5	0.57
hsa-mir-652-3p	GAAUGGC	0	0.24	0	0	0.16	0.24	0	0	0.25
hsa-mir-652-3p	AUGGCGC	1	0.59	0.98	0.98	0.5	0.5	0.97	0.98	0.39
hsa-mir-652-3p	UGGCGCC	0	0.1	0.01	0.02	0.3	0.26	0.02	0.01	0.36
hsa-mir-664-5p	CUGGCUA	1	0.31	0.29	0.39	0.4	0.43	0.68	0.29	0.6
hsa-mir-664-5p	UGGCUAG	0	0.5	0.65	0.45	0.42	0.37	0.14	0.61	0.29
hsa-mir-664-5p	GGCUAGG	0	0.13	0.04	0.15	0.12	0.18	0.09	0.07	0.08
hsa-mir-708-3p	AACUAGA	0.1	0.23	0.2	0.3	0.34	0.21	0.37	0.32	0.33
hsa-mir-708-3p	ACUAGAC	0.9	0.66	0.69	0.59	0.59	0.61	0.54	0.58	0.53
hsa-mir-708-3p	CUAGACU	0	0.07	0.07	0.09	0.06	0.14	0.07	0.06	0.1
% indicates the % of reads aligning to each miRNA with the corresponding annotated seed sequence reported in column two.
